# Supplementary material for: Proteomic Investigations of Autism Brain Identify Known and Novel Pathogenetic Processes
Source: PubMed Central journal article supplement (PMC6739414; doi:10.1038/s41598-019-49533-y), 2019-09-11

## Proteomic Investigations of Autism Brain Identify Known and Novel Pathogenetic Processes

Joseph R. Abraham<sup>1</sup>, Nicholas Szoko<sup>1</sup>, John Barnard<sup>2</sup>, Robert A. Rubin<sup>3</sup>, Daniela Schlatzer<sup>4</sup>,  
Kathleen Lundberg<sup>4</sup>, Xiaolin Li<sup>4</sup>, Marvin R. Natowicz<sup>1,5,\*</sup>

<sup>1</sup>Cleveland Clinic Lerner College of Medicine of Case Western Reserve University, Cleveland, OH, 44195

<sup>2</sup>Department of Quantitative Health Sciences, Lerner Research Institute, Cleveland Clinic, Cleveland, OH, 44195

<sup>3</sup>Department of Mathematics, Whittier College, Whittier, CA, 90602

<sup>4</sup>Center for Proteomics, Case Western Reserve University, Cleveland, OH, 44106

<sup>5</sup>Pathology and Laboratory Medicine, Genomic Medicine, Neurological and Pediatrics Institutes, Cleveland Clinic, Cleveland OH, 44195

**\*Correspondence:**

Marvin Natowicz, MD, PhD  
Pathology and Laboratory Medicine Institute  
Cleveland Clinic, LL-3  
9500 Euclid Avenue  
Cleveland, OH 44195  
[natowim@ccf.org](mailto:natowim@ccf.org)

## Supplementary Tables and Figures

Supplementary Table 1. Individual subject characteristics. PMI, postmortem interval; COD, cause of death.

| Subject ID: | Subject ATP ID: | Diagnosis | Regions          | Age (years) | PMI (hours) | COD     | Ethnicity | Medications                                                               |
|-------------|-----------------|-----------|------------------|-------------|-------------|---------|-----------|---------------------------------------------------------------------------|
| 6399        | AN03345         | Autism    | Cerebellum, BA19 | 2           | 4           | Hypoxia | White     | None reported                                                             |
| 7078        | AN17678         | Autism    | Cerebellum       | 11          |             | Other   | White     | None reported                                                             |
| 6677        | AN11989         | Autism    | Cerebellum, BA19 | 30          | 16          | Cardiac | White     | None reported                                                             |
| 6337        | AN09730         | Autism    | Cerebellum, BA19 | 22          | 25          | Hypoxia | White     | Aripiprazole, lamotrigine, fish oil, multivitamin, zonisamide             |
| 6994        | AN08166         | Autism    | Cerebellum, BA19 | 28          | 43          | Other   | Unknown   | Ziprasidone, cambamazepine, fexofenadine                                  |
| 5666        | AN19511         | Autism    | Cerebellum, BA19 | 8           | 22.2        | Cancer  | White     | None reported                                                             |
| 6401        | AN06420         | Autism    | Cerebellum, BA19 | 39          | 14          | Cardiac | White     | None reported                                                             |
| 5569        | AN08873         | Autism    | Cerebellum, BA19 | 5           | 25.5        | Hypoxia | White     | Fluoxetine                                                                |
| 7090        | AN09714         | Autism    | Cerebellum, BA19 | 60          | 26.5        | Cancer  | Unknown   | Omeprazole, docusate, diazepam, phenobarbital, carbamazepine, guaifenesin |
| 5334        | AN15622         | Control   | Cerebellum, BA19 | 30          | 15          | Hypoxia | White     | None reported                                                             |
| 6200        | AN10723         | Control   | Cerebellum, BA19 | 60          | 24.2        | Unknown | Unknown   | None reported                                                             |
| 7561        | AN05475         | Control   | Cerebellum, BA19 | 39          |             | Cardiac | Unknown   | None reported                                                             |
| 5718        | AN10833         | Control   | Cerebellum, BA19 | 22          | 21.5        | Unknown | Unknown   | None reported                                                             |
| 4678        | UMB4670         | Control   | Cerebellum, BA19 | 4           | 17          | Cardiac | White     | None reported                                                             |
| 1453        | BTB1453         | Control   | Cerebellum, BA19 | 1           | 19          | Unknown | Black     | None reported                                                             |
| 3328        | BTB3228         | Control   | Cerebellum       | 11          | 20          | Other   | Unknown   | None reported                                                             |
| 4543        | UMB4543         | Control   | Cerebellum, BA19 | 28          | 13          | Other   | White     | None reported                                                             |
| 1860        | UMB1860         | Control   | Cerebellum, BA19 | 8           | 5           | Cardiac | White     | None reported                                                             |

Supplementary Table 2. List of all differentially expressed proteins by brain region with p-value, adjusted p-value, and % expression in ASD (A) vs controls (C).

BA19 Differentially Expressed Proteins

| Accession ID | Protein symbol | P-values | Adjusted p-value | % Expression (A vs C) |
|--------------|----------------|----------|------------------|-----------------------|
| P46821       | MAP1B          | 1.86E-09 | 2.54E-06         | 84.1                  |
| P49327       | FAS            | 9.91E-08 | 6.76E-05         | 88.6                  |
| P02787       | TF             | 5.95E-07 | 2.71E-04         | 67.8                  |
| P14136       | GFAP           | 5.36E-06 | 1.83E-03         | 55.2                  |
| P02675       | FGB            | 6.84E-06 | 1.87E-03         | 296.3                 |
| O75955       | FLOT1          | 1.03E-05 | 2.34E-03         | 147.8                 |
| Q92561       | PHYHIP         | 3.78E-05 | 7.37E-03         | 128.0                 |
| P02679       | FGG            | 5.90E-05 | 1.01E-02         | 302.8                 |
| Q99961       | SH3GL1         | 1.12E-04 | 1.39E-02         | 133.0                 |
| P08107       | HSPA1A         | 1.30E-04 | 1.48E-02         | 149.4                 |
| Q9P1U1       | ACTR3B         | 1.66E-04 | 1.67E-02         | 82.2                  |
| O00571       | DDX3X          | 1.71E-04 | 1.67E-02         | 121.4                 |
| Q9NZN3       | EHD3           | 1.92E-04 | 1.75E-02         | 120.2                 |
| P01024       | C3             | 3.20E-04 | 2.73E-02         | 173.5                 |
| P35222       | CTNNB1         | 3.67E-04 | 2.78E-02         | 83.5                  |
| P11766       | ADH5           | 3.70E-04 | 2.78E-02         | 114.9                 |
| P78352       | DLG4           | 3.87E-04 | 2.78E-02         | 118.6                 |
| Q93050       | ATP6V0A1       | 4.36E-04 | 2.97E-02         | 118.9                 |
| Q14011       | CIRBP          | 5.03E-04 | 3.27E-02         | 50.5                  |
| Q9Y6K8       | AK5            | 5.52E-04 | 3.43E-02         | 80.3                  |
| P21266       | GSTM3          | 6.39E-04 | 3.78E-02         | 69.1                  |
| Q92823       | NRCAM          | 6.64E-04 | 3.78E-02         | 85.3                  |
| P13693       | TPT1           | 7.61E-04 | 4.11E-02         | 81.6                  |
| P07197       | NEFM           | 9.19E-04 | 4.60E-02         | 81.8                  |
| Q59EK9       | RUNDC3A        | 9.43E-04 | 4.60E-02         | 126.5                 |
| Q16352       | INA            | 1.04E-03 | 4.84E-02         | 78.7                  |
| P02671       | FGA            | 1.06E-03 | 4.84E-02         | 325.1                 |
| P09497       | CLTB           | 1.19E-03 | 5.14E-02         | 63.6                  |
| O00533       | CHL1           | 1.21E-03 | 5.14E-02         | 121.1                 |
| Q16698       | DECR1          | 1.34E-03 | 5.54E-02         | 121.1                 |
| P12814       | ACTN1          | 1.49E-03 | 5.98E-02         | 111.0                 |
| Q9HB71       | CACYBP         | 1.64E-03 | 6.39E-02         | 117.9                 |
| Q8IXJ6       | SIRT2          | 2.11E-03 | 7.34E-02         | 78.3                  |
| Q02878       | RPL6           | 2.14E-03 | 7.34E-02         | 86.7                  |
| Q14254       | FLOT2          | 2.15E-03 | 7.34E-02         | 141.3                 |
| Q14204       | DYNC1H1        | 2.50E-03 | 8.32E-02         | 93.4                  |

|        |         |          |          |       |
|--------|---------|----------|----------|-------|
| P12955 | PEPD    | 2.70E-03 | 8.77E-02 | 83.4  |
| P53396 | ACLY    | 2.93E-03 | 9.09E-02 | 121.0 |
| O14994 | SYN3    | 2.95E-03 | 9.09E-02 | 83.9  |
| P23471 | PTPRZ1  | 3.00E-03 | 9.09E-02 | 88.5  |
| P02768 | ALB     | 3.26E-03 | 9.54E-02 | 84.5  |
| P11137 | MTAP2   | 3.28E-03 | 9.54E-02 | 85.4  |
| P43003 | SLC1A3  | 3.56E-03 | 9.92E-02 | 194.7 |
| O14936 | CASK    | 4.09E-03 | 1.09E-01 | 113.1 |
| Q15700 | DLG2    | 4.17E-03 | 1.10E-01 | 111.8 |
| P38646 | HSPA9   | 4.69E-03 | 1.19E-01 | 162.4 |
| P0C0L4 | C4A     | 5.17E-03 | 1.22E-01 | 85.2  |
| Q99963 | SH3GL3  | 5.20E-03 | 9.93E-02 | 114.8 |
| P46439 | GSTM5   | 5.38E-03 | 1.22E-01 | 116.6 |
| Q6YN16 | HSDL2   | 5.54E-03 | 1.22E-01 | 30.4  |
| P00387 | CYB5R3  | 5.55E-03 | 1.22E-01 | 80.5  |
| Q08209 | PPP3CA  | 5.84E-03 | 1.27E-01 | 112.4 |
| P49773 | HINT1   | 6.48E-03 | 1.36E-01 | 81.5  |
| P43007 | SLC1A4  | 6.63E-03 | 1.36E-01 | 122.0 |
| O75396 | SEC22B  | 6.68E-03 | 1.36E-01 | 133.5 |
| P31937 | HIBADH  | 7.26E-03 | 1.36E-01 | 139.6 |
| P55786 | NPEPPS  | 7.46E-03 | 1.36E-01 | 91.1  |
| P07196 | NEFL    | 8.14E-03 | 1.44E-01 | 84.9  |
| O43865 | AHCYL1  | 8.59E-03 | 1.50E-01 | 112.8 |
| O94985 | CLSTN1  | 8.98E-03 | 1.55E-01 | 78.3  |
| P31943 | HNRNPH1 | 9.36E-03 | 1.57E-01 | 116.3 |
| P13611 | VCAN    | 9.84E-03 | 1.60E-01 | 68.5  |
| Q9BPU6 | DPYSL5  | 1.00E-02 | 1.60E-01 | 78.9  |
| Q9NQC3 | RTN4    | 1.02E-02 | 1.60E-01 | 83.6  |
| Q9Y3F4 | STRAP   | 1.07E-02 | 1.64E-01 | 74.5  |
| P23634 | ATP2B4  | 1.09E-02 | 1.65E-01 | 76.9  |
| Q6PCE3 | PGM2L1  | 1.10E-02 | 1.65E-01 | 113.5 |
| O43776 | SYNC    | 1.12E-02 | 1.67E-01 | 89.9  |
| P01034 | CST3    | 1.16E-02 | 1.71E-01 | 66.2  |
| Q9UH03 | SEPT3   | 1.18E-02 | 1.71E-01 | 112.3 |
| P51452 | DUSP3   | 1.30E-02 | 1.82E-01 | 76.7  |
| Q14832 | GRM3    | 1.31E-02 | 1.83E-01 | 129.8 |
| Q99719 | SEPT5   | 1.34E-02 | 1.84E-01 | 121.2 |
| P42704 | LRPPRC  | 1.39E-02 | 1.88E-01 | 90.7  |
| Q9BRX8 | FAM213A | 1.43E-02 | 1.91E-01 | 82.7  |
| O60763 | USO1    | 1.50E-02 | 1.97E-01 | 125.8 |
| O60282 | KIF5C   | 1.53E-02 | 1.97E-01 | 79.6  |

|        |         |          |          |       |
|--------|---------|----------|----------|-------|
| P01871 | IGHM    | 1.58E-02 | 2.00E-01 | 72.0  |
| P45974 | USP5    | 1.58E-02 | 2.00E-01 | 85.7  |
| P49591 | SARS    | 1.62E-02 | 2.01E-01 | 82.7  |
| Q9Y2A7 | NCKAP1  | 1.78E-02 | 2.17E-01 | 112.1 |
| P30041 | PRDX6   | 1.83E-02 | 2.20E-01 | 116.5 |
| P07305 | H1F0    | 1.86E-02 | 2.20E-01 | 74.9  |
| P30519 | HMOX2   | 1.88E-02 | 2.20E-01 | 86.4  |
| Q9UMF0 | ICAM5   | 1.89E-02 | 2.20E-01 | 126.0 |
| Q9NYU2 | UGGT1   | 1.98E-02 | 2.21E-01 | 109.2 |
| P62701 | RPS4X   | 1.99E-02 | 2.21E-01 | 112.4 |
| Q00610 | CLTC    | 1.99E-02 | 2.21E-01 | 89.3  |
| P30048 | PRDX3   | 2.05E-02 | 2.26E-01 | 110.7 |
| O95299 | NDUFA10 | 2.13E-02 | 2.29E-01 | 110.6 |
| O00154 | ACOT7   | 2.30E-02 | 2.45E-01 | 86.0  |
| P42262 | GRIA2   | 2.32E-02 | 2.45E-01 | 115.3 |
| P31153 | MAT2A   | 2.46E-02 | 2.51E-01 | 73.4  |
| Q13509 | TUBB3   | 2.47E-02 | 2.51E-01 | 86.5  |
| Q01082 | SPTBN1  | 2.48E-02 | 2.51E-01 | 94.6  |
| P27797 | CALR    | 2.49E-02 | 2.51E-01 | 111.9 |
| P30085 | CMPK1   | 2.55E-02 | 2.54E-01 | 112.6 |
| Q9NSE4 | IARS2   | 2.55E-02 | 2.54E-01 | 109.6 |
| P60880 | SNAP25  | 2.57E-02 | 2.54E-01 | 85.3  |
| P68104 | EEF1A1  | 2.61E-02 | 2.54E-01 | 86.2  |
| Q9NVA2 | SEP11   | 2.64E-02 | 2.54E-01 | 94.1  |
| O15020 | SPTBN2  | 2.64E-02 | 2.54E-01 | 117.5 |
| P78417 | GSTO1   | 2.69E-02 | 2.54E-01 | 82.8  |
| P45985 | MAP2K4  | 2.69E-02 | 2.54E-01 | 108.7 |
| P00338 | LDHA    | 2.77E-02 | 2.54E-01 | 112.4 |
| P02649 | APOE    | 2.80E-02 | 2.57E-01 | 85.6  |
| O15075 | DCLK1   | 2.88E-02 | 2.57E-01 | 119.4 |
| P01023 | A2M     | 2.91E-02 | 2.57E-01 | 123.3 |
| Q9Y2Q0 | ATP8A1  | 2.95E-02 | 2.57E-01 | 75.8  |
| Q7L099 | RUFY3   | 2.95E-02 | 2.57E-01 | 89.5  |
| P62424 | RPL7A   | 2.96E-02 | 2.57E-01 | 92.5  |
| P31689 | DNAJA1  | 2.97E-02 | 2.57E-01 | 88.0  |
| Q9NUQ9 | FAM49B  | 3.00E-02 | 2.57E-01 | 131.6 |
| Q9BSJ8 | ESYT1   | 3.00E-02 | 2.57E-01 | 78.7  |
| Q9Y617 | PSAT1   | 3.01E-02 | 2.63E-01 | 78.8  |
| P08133 | ANXA6   | 3.03E-02 | 2.63E-01 | 77.9  |
| Q9UNM6 | PSMD13  | 3.08E-02 | 2.63E-01 | 112.6 |
| P62081 | RPS7    | 3.19E-02 | 2.63E-01 | 116.3 |

|        |          |          |          |       |
|--------|----------|----------|----------|-------|
| P04181 | OAT      | 3.22E-02 | 2.63E-01 | 82.5  |
| Q9H0B6 | KLC2     | 3.26E-02 | 2.63E-01 | 88.8  |
| Q9BYB0 | SHANK3   | 3.31E-02 | 2.63E-01 | 121.6 |
| Q9UPR5 | SLC8A2   | 3.32E-02 | 2.63E-01 | 81.6  |
| P30043 | BLVRB    | 3.37E-02 | 2.63E-01 | 86.8  |
| P32969 | RPL9     | 3.41E-02 | 2.63E-01 | 118.3 |
| P09429 | HMGB1    | 3.42E-02 | 2.63E-01 | 89.5  |
| Q9BPX5 | ARPC5L   | 3.42E-02 | 2.63E-01 | 106.6 |
| P37837 | TALDO1   | 3.45E-02 | 2.63E-01 | 88.6  |
| P24752 | ACAT1    | 3.48E-02 | 2.63E-01 | 79.6  |
| Q02790 | FKBP4    | 3.50E-02 | 2.63E-01 | 88.2  |
| P52209 | PGD      | 3.50E-02 | 2.63E-01 | 121.3 |
| Q13554 | CAMK2B   | 3.58E-02 | 2.67E-01 | 87.3  |
| P62244 | RPS15A   | 3.61E-02 | 2.68E-01 | 83.3  |
| P13645 | KRT10    | 3.81E-02 | 2.81E-01 | 76.3  |
| P50914 | RPL14    | 3.90E-02 | 2.83E-01 | 88.6  |
| Q15149 | PLEC     | 4.05E-02 | 2.87E-01 | 64.5  |
| Q7Z3D6 | DGLUCY   | 4.06E-02 | 2.87E-01 | 93.9  |
| P19105 | MYL12A   | 4.13E-02 | 2.89E-01 | 125.4 |
| P63092 | GNAS     | 4.20E-02 | 2.92E-01 | 113.1 |
| P22695 | UQCRC2   | 4.23E-02 | 2.92E-01 | 83.9  |
| O60861 | GAS7     | 4.23E-02 | 2.92E-01 | 89.8  |
| P13637 | ATP1A3   | 4.29E-02 | 2.92E-01 | 88.7  |
| P14866 | HNRNPL   | 4.33E-02 | 2.93E-01 | 107.9 |
| P07900 | HSP90AA1 | 4.61E-02 | 3.06E-01 | 168.1 |
| Q14318 | FKBP8    | 4.64E-02 | 3.06E-01 | 82.3  |
| O75569 | PRKRA    | 4.64E-02 | 3.06E-01 | 110.0 |
| P49006 | MARCKSL1 | 4.85E-02 | 3.15E-01 | 71.2  |

### CB Differentially Expressed Proteins

| Accession ID | Protein symbol | P-value  | Adjusted p-value | % Expression (A vs C) |
|--------------|----------------|----------|------------------|-----------------------|
| P02768       | ALBU           | 7.03E-13 | 1.01E-09         | 67                    |
| Q14643       | ITPR1          | 2.31E-12 | 1.65E-09         | 136                   |
| P02042       | HBD            | 4.64E-11 | 2.21E-08         | 57                    |
| Q01814       | AT2B2          | 3.32E-09 | 1.19E-06         | 125                   |
| Q9NYI0       | PSD3           | 1.35E-08 | 3.86E-06         | 156                   |
| P02787       | TRFE           | 7.82E-08 | 1.86E-05         | 64                    |
| P07196       | NFL            | 2.18E-07 | 4.46E-05         | 75                    |
| P19367       | HXK1           | 6.88E-07 | 1.23E-04         | 117                   |
| Q7Z3D6       | GLUCM          | 1.21E-06 | 1.92E-04         | 59                    |
| P12036       | NFH            | 2.36E-06 | 3.38E-04         | 74                    |
| P17600       | SYN1           | 6.30E-06 | 8.19E-04         | 137                   |

|        |       |          |          |     |
|--------|-------|----------|----------|-----|
| P16152 | CBR1  | 7.63E-06 | 9.10E-04 | 80  |
| Q01484 | ANK2  | 1.17E-05 | 1.24E-03 | 116 |
| P07197 | NFM   | 1.21E-05 | 1.24E-03 | 71  |
| O15020 | SPTN2 | 1.32E-05 | 1.26E-03 | 116 |
| Q9H4G0 | E41L1 | 1.89E-05 | 1.69E-03 | 133 |
| Q02790 | FKBP4 | 2.48E-05 | 2.03E-03 | 127 |
| Q13554 | KCC2B | 2.56E-05 | 2.03E-03 | 124 |
| P05091 | ALDH2 | 3.17E-05 | 2.39E-03 | 74  |
| P06396 | GELS  | 3.86E-05 | 2.76E-03 | 84  |
| Q9Y2J2 | E41L3 | 4.56E-05 | 3.11E-03 | 117 |
| P69905 | HBA   | 5.09E-05 | 3.31E-03 | 62  |
| Q14204 | DYHC1 | 5.39E-05 | 3.33E-03 | 109 |
| Q99719 | SEPT5 | 5.58E-05 | 3.33E-03 | 125 |
| Q14168 | MPP2  | 2.26E-04 | 1.29E-02 | 124 |
| Q15149 | PLEC  | 2.37E-04 | 1.30E-02 | 87  |
| P04040 | CATA  | 2.76E-04 | 1.46E-02 | 68  |
| P07900 | HS90A | 3.23E-04 | 1.65E-02 | 118 |
| Q9P2U7 | VGLU1 | 4.47E-04 | 2.18E-02 | 131 |
| P00918 | CAH2  | 4.56E-04 | 2.18E-02 | 76  |
| Q9NSC5 | HOME3 | 4.77E-04 | 2.20E-02 | 130 |
| Q9Y6R1 | S4A4  | 4.95E-04 | 2.21E-02 | 125 |
| Q9UPA5 | BSN   | 9.40E-04 | 3.96E-02 | 171 |
| P04264 | K2C1  | 1.01E-03 | 4.14E-02 | 133 |
| P10636 | TAU   | 1.07E-03 | 4.24E-02 | 138 |
| P35219 | CAH8  | 1.24E-03 | 4.81E-02 | 132 |
| Q8N9I0 | SYT2  | 1.32E-03 | 4.95E-02 | 127 |
| Q9Y3E1 | HDGR3 | 1.35E-03 | 4.95E-02 | 124 |
| Q9ULP0 | NDRG4 | 1.45E-03 | 5.18E-02 | 127 |
| O75746 | CMC1  | 1.65E-03 | 5.77E-02 | 114 |
| Q08209 | PP2BA | 1.81E-03 | 5.97E-02 | 118 |
| P35908 | K22E  | 1.82E-03 | 5.97E-02 | 139 |
| Q9P2R7 | SUCB1 | 1.84E-03 | 5.97E-02 | 114 |
| P07954 | FUMH  | 1.92E-03 | 6.10E-02 | 88  |
| P07339 | CATD  | 2.18E-03 | 6.79E-02 | 76  |
| P16615 | AT2A2 | 2.29E-03 | 6.97E-02 | 114 |
| P28482 | MK01  | 2.43E-03 | 7.23E-02 | 115 |
| P48664 | EAA4  | 2.52E-03 | 7.33E-02 | 151 |
| P37837 | TALDO | 2.56E-03 | 7.33E-02 | 117 |
| Q96FC7 | PHIPL | 2.77E-03 | 7.48E-02 | 126 |
| P02730 | B3AT  | 2.81E-03 | 7.48E-02 | 61  |
| P63027 | VAMP2 | 2.82E-03 | 7.48E-02 | 173 |

|        |       |          |          |     |
|--------|-------|----------|----------|-----|
| O14531 | DPYL4 | 2.84E-03 | 7.48E-02 | 128 |
| Q15700 | DLG2  | 2.88E-03 | 7.48E-02 | 126 |
| Q13557 | KCC2D | 2.97E-03 | 7.48E-02 | 117 |
| Q9Y2A7 | NCKP1 | 2.98E-03 | 7.48E-02 | 115 |
| P30048 | PRDX3 | 3.52E-03 | 8.69E-02 | 79  |
| P38646 | GRP75 | 3.78E-03 | 9.15E-02 | 87  |
| Q08722 | CD47  | 3.97E-03 | 9.41E-02 | 121 |
| P24752 | THIL  | 4.01E-03 | 9.41E-02 | 79  |
| Q13885 | TBB2A | 4.21E-03 | 9.49E-02 | 113 |
| P21926 | CD9   | 4.24E-03 | 9.49E-02 | 68  |
| Q92598 | HS105 | 4.60E-03 | 1.01E-01 | 128 |
| P00915 | CAH1  | 4.69E-03 | 1.01E-01 | 70  |
| P08237 | PFKAM | 4.74E-03 | 1.01E-01 | 114 |
| Q86VP6 | CAND1 | 5.40E-03 | 1.14E-01 | 109 |
| P13637 | AT1A3 | 5.64E-03 | 1.16E-01 | 119 |
| Q9UM19 | HPCL4 | 5.69E-03 | 1.16E-01 | 119 |
| Q9UKA9 | PTBP2 | 5.93E-03 | 1.18E-01 | 118 |
| Q969P0 | IGSF8 | 6.01E-03 | 1.18E-01 | 120 |
| P15531 | NDKA  | 6.25E-03 | 1.21E-01 | 82  |
| P14415 | AT1B2 | 6.37E-03 | 1.21E-01 | 125 |
| Q02252 | MMSA  | 6.53E-03 | 1.23E-01 | 87  |
| Q7Z6L0 | PRRT2 | 6.81E-03 | 1.25E-01 | 148 |
| P05026 | AT1B1 | 6.89E-03 | 1.25E-01 | 112 |
| Q06830 | PRDX1 | 6.96E-03 | 1.25E-01 | 86  |
| P00352 | AL1A1 | 7.54E-03 | 1.31E-01 | 123 |
| P21283 | VATC1 | 7.59E-03 | 1.31E-01 | 113 |
| P02545 | LMNA  | 7.95E-03 | 1.33E-01 | 80  |
| P01857 | IGHG1 | 7.99E-03 | 1.33E-01 | 75  |
| P30043 | BLVRB | 8.56E-03 | 1.40E-01 | 54  |
| P52306 | GDS1  | 8.64E-03 | 1.40E-01 | 113 |
| P23634 | AT2B4 | 8.88E-03 | 1.42E-01 | 116 |
| P98179 | RBM3  | 9.02E-03 | 1.42E-01 | 67  |
| Q99714 | HCD2  | 9.07E-03 | 1.42E-01 | 88  |
| P40939 | ECHA  | 9.13E-03 | 1.42E-01 | 87  |
| Q9BWM7 | SFXN3 | 9.39E-03 | 1.44E-01 | 118 |
| P22748 | CAH4  | 9.46E-03 | 1.44E-01 | 139 |
| Q9HB71 | CYBP  | 9.59E-03 | 1.44E-01 | 113 |
| P51674 | GPM6A | 1.04E-02 | 1.49E-01 | 143 |
| P60880 | SNP25 | 1.05E-02 | 1.49E-01 | 125 |
| Q92823 | NRCAM | 1.05E-02 | 1.49E-01 | 111 |
| Q9NZ45 | CISD1 | 1.07E-02 | 1.49E-01 | 114 |



|        |       |          |          |     |
|--------|-------|----------|----------|-----|
| Q9UI12 | VATH  | 1.08E-02 | 1.49E-01 | 116 |
| P17844 | DDX5  | 1.08E-02 | 1.49E-01 | 83  |
| P17677 | NEUM  | 1.09E-02 | 1.49E-01 | 127 |
| P08247 | SYPH  | 1.09E-02 | 1.49E-01 | 132 |
| P00568 | KAD1  | 1.10E-02 | 1.49E-01 | 76  |
| P02675 | FIBB  | 1.16E-02 | 1.54E-01 | 155 |
| Q9UPR5 | NAC2  | 1.20E-02 | 1.57E-01 | 121 |
| Q9UH03 | SEPT3 | 1.21E-02 | 1.57E-01 | 117 |
| Q14576 | ELAV3 | 1.28E-02 | 1.63E-01 | 124 |
| Q8IV01 | SYT12 | 1.37E-02 | 1.72E-01 | 112 |
| P37235 | HPCL1 | 1.47E-02 | 1.82E-01 | 120 |
| P08670 | VIME  | 1.50E-02 | 1.83E-01 | 60  |
| P09211 | GSTP1 | 1.52E-02 | 1.85E-01 | 74  |
| Q9NS86 | LANC2 | 1.54E-02 | 1.85E-01 | 135 |
| P49327 | FAS   | 1.58E-02 | 1.88E-01 | 108 |
| P14136 | GFAP  | 1.60E-02 | 1.88E-01 | 75  |
| P55084 | ECHB  | 1.65E-02 | 1.89E-01 | 88  |
| O43424 | GRID2 | 1.66E-02 | 1.89E-01 | 125 |
| P68871 | HBB   | 1.67E-02 | 1.89E-01 | 56  |
| Q9HDB5 | NRX3B | 1.68E-02 | 1.89E-01 | 120 |
| Q9UQ03 | COR2B | 1.70E-02 | 1.90E-01 | 119 |
| P08865 | RSSA  | 1.72E-02 | 1.90E-01 | 88  |
| Q92561 | PHYIP | 1.74E-02 | 1.90E-01 | 120 |
| O14745 | NHRF1 | 1.75E-02 | 1.90E-01 | 81  |
| Q86UW7 | CAPS2 | 1.75E-02 | 1.90E-01 | 132 |
| P07099 | HYEP  | 1.78E-02 | 1.92E-01 | 68  |
| P02765 | FETUA | 1.80E-02 | 1.93E-01 | 54  |
| Q9C005 | DPY30 | 1.87E-02 | 1.98E-01 | 70  |
| P08133 | ANXA6 | 1.88E-02 | 1.98E-01 | 88  |
| Q7Z3B1 | NEGR1 | 1.91E-02 | 1.98E-01 | 120 |
| P22392 | NDKB  | 1.91E-02 | 1.98E-01 | 84  |
| P02647 | APOA1 | 1.92E-02 | 1.98E-01 | 49  |
| Q8TB36 | GDAP1 | 1.99E-02 | 2.04E-01 | 120 |
| O75122 | CLAP2 | 2.01E-02 | 2.04E-01 | 116 |
| P35527 | K1C9  | 2.10E-02 | 2.10E-01 | 126 |
| P22061 | PIMT  | 2.11E-02 | 2.10E-01 | 76  |
| O43426 | SYNJ1 | 2.11E-02 | 2.10E-01 | 121 |
| Q9H2X9 | S12A5 | 2.24E-02 | 2.17E-01 | 119 |
| P43304 | GPDM  | 2.25E-02 | 2.17E-01 | 112 |
| Q9NY65 | TBA8  | 2.25E-02 | 2.17E-01 | 121 |
| P55809 | SCOT1 | 2.26E-02 | 2.17E-01 | 108 |

|        |       |          |          |     |
|--------|-------|----------|----------|-----|
| P17655 | CAN2  | 2.28E-02 | 2.17E-01 | 86  |
| O95865 | DDAH2 | 2.34E-02 | 2.21E-01 | 81  |
| Q92597 | NDRG1 | 2.36E-02 | 2.21E-01 | 77  |
| Q9P2K5 | MYEF2 | 2.40E-02 | 2.23E-01 | 116 |
| P20472 | PRVA  | 2.44E-02 | 2.23E-01 | 119 |
| P28161 | GSTM2 | 2.50E-02 | 2.27E-01 | 88  |
| Q9ULU8 | CAPS1 | 2.57E-02 | 2.31E-01 | 119 |
| Q13367 | AP3B2 | 2.67E-02 | 2.37E-01 | 119 |
| Q96E17 | RAB3C | 2.67E-02 | 2.37E-01 | 133 |
| O60268 | K0513 | 2.69E-02 | 2.38E-01 | 150 |
| Q96ID5 | IGS21 | 2.73E-02 | 2.40E-01 | 133 |
| P07237 | PDIA1 | 2.82E-02 | 2.45E-01 | 88  |
| P42126 | ECI1  | 2.87E-02 | 2.47E-01 | 79  |
| P05023 | AT1A1 | 2.98E-02 | 2.54E-01 | 108 |
| P00738 | HPT   | 3.05E-02 | 2.56E-01 | 181 |
| Q9UBQ7 | GRHPR | 3.05E-02 | 2.56E-01 | 88  |
| P14550 | AK1A1 | 3.15E-02 | 2.61E-01 | 93  |
| O14594 | NCAN  | 3.18E-02 | 2.61E-01 | 152 |
| Q9NZN3 | EHD3  | 3.18E-02 | 2.61E-01 | 120 |
| Q14318 | FKBP8 | 3.20E-02 | 2.61E-01 | 136 |
| P31937 | 3HIDH | 3.23E-02 | 2.61E-01 | 83  |
| Q9UBB6 | NCDN  | 3.32E-02 | 2.64E-01 | 110 |
| P07602 | SAP   | 3.32E-02 | 2.64E-01 | 77  |
| Q9UKU0 | ACSL6 | 3.36E-02 | 2.66E-01 | 120 |
| Q92522 | H1X   | 3.42E-02 | 2.69E-01 | 114 |
| P52757 | CHIO  | 3.48E-02 | 2.71E-01 | 137 |
| A6NE02 | BTBDH | 3.50E-02 | 2.71E-01 | 144 |
| O95831 | AIFM1 | 3.53E-02 | 2.72E-01 | 85  |
| P09960 | LKHA4 | 3.57E-02 | 2.73E-01 | 114 |
| O14979 | HNRDL | 3.60E-02 | 2.74E-01 | 85  |
| Q8TCU6 | PREX1 | 3.71E-02 | 2.79E-01 | 126 |
| P05937 | CALB1 | 3.76E-02 | 2.82E-01 | 120 |
| P13591 | NCAM1 | 3.81E-02 | 2.82E-01 | 108 |
| Q96JE9 | MAP6  | 3.83E-02 | 2.82E-01 | 124 |
| Q9H6S3 | ES8L2 | 3.84E-02 | 2.82E-01 | 124 |
| P23471 | PTPRZ | 3.86E-02 | 2.82E-01 | 113 |
| Q09666 | AHNK  | 3.87E-02 | 2.82E-01 | 74  |
| Q05193 | DYN1  | 3.96E-02 | 2.87E-01 | 114 |
| Q96FJ2 | DYL2  | 3.97E-02 | 2.87E-01 | 121 |
| Q99497 | PARK7 | 4.01E-02 | 2.89E-01 | 84  |
| Q9UK22 | FBX2  | 4.09E-02 | 2.91E-01 | 119 |
| P21266 | GSTM3 | 4.20E-02 | 2.96E-01 | 78  |

|        |          |          |          |     |
|--------|----------|----------|----------|-----|
| P30101 | PDIA3    | 4.23E-02 | 2.97E-01 | 89  |
| Q92777 | SYN2     | 4.32E-02 | 3.00E-01 | 116 |
| P09471 | GNAO     | 4.34E-02 | 3.00E-01 | 116 |
| Q16836 | HCDH     | 4.39E-02 | 3.00E-01 | 89  |
| P30084 | ECHM     | 4.40E-02 | 3.00E-01 | 86  |
| P48735 | IDHP     | 4.41E-02 | 3.00E-01 | 86  |
| P42765 | THIM     | 4.45E-02 | 3.02E-01 | 76  |
| Q14194 | DPYL1    | 4.50E-02 | 3.03E-01 | 110 |
| Q9H2U2 | IPYR2    | 4.65E-02 | 3.08E-01 | 81  |
| Q92752 | TENR     | 4.67E-02 | 3.08E-01 | 117 |
| O75363 | BCAS1    | 4.68E-02 | 3.08E-01 | 65  |
| Q96F07 | CYFP2    | 4.78E-02 | 3.14E-01 | 113 |
| P02679 | FIBG     | 4.84E-02 | 3.16E-01 | 149 |
| P16401 | HIST1H1B | 0.048936 | 3.18E-01 | 67  |
| O00567 | NOP56    | 0.049988 | 3.20E-01 | 117 |

Supplementary Table 3. List of proteins differentially expressed regionally in both ASD and Control datasets. Bolded proteins represent the 3 of 547 proteins that did not show directionality concordance in regional expression.

| UniProt Protein | Log Expr ASD | Log Expr Controls | P-value ASD | P-value Controls | UniProt Protein | Log Expr ASD | Log Expr Controls | P-value ASD | P-value Controls |
|-----------------|--------------|-------------------|-------------|------------------|-----------------|--------------|-------------------|-------------|------------------|
| O00154          | -0.71        | -1.02             | 5.85E-11    | 2.76E-11         | P50395          | -0.40        | -0.51             | 7.86E-10    | 6.93E-18         |
| O00429          | -1.28        | -1.44             | 1.55E-24    | 1.82E-27         | P50897          | 0.45         | 0.83              | 9.41E-03    | 8.06E-06         |
| O00483          | -0.88        | -0.54             | 7.41E-11    | 2.63E-04         | P50991          | -0.13        | -0.21             | 4.04E-02    | 1.26E-03         |
| O00499          | -0.79        | -1.14             | 4.43E-13    | 9.71E-16         | P50993          | -0.65        | -0.68             | 6.01E-22    | 3.53E-27         |
| O00764          | -0.87        | -1.02             | 4.29E-07    | 1.54E-12         | P51148          | -0.68        | -0.66             | 4.18E-12    | 3.95E-12         |
| O14531          | -1.87        | -2.33             | 1.78E-18    | 3.48E-16         | P51649          | -0.44        | -0.47             | 1.29E-04    | 1.12E-05         |
| O14561          | -0.51        | -0.32             | 1.69E-03    | 9.57E-04         | P51970          | -0.35        | -0.27             | 1.42E-03    | 2.09E-02         |
| O14594          | -1.71        | -2.50             | 5.08E-14    | 5.62E-08         | P51991          | 2.03         | 2.20              | 1.89E-19    | 1.86E-22         |
| O14745          | 0.75         | 0.98              | 8.09E-05    | 4.73E-06         | P52209          | -0.41        | -0.54             | 5.30E-05    | 2.40E-09         |
| O14818          | -0.34        | -0.32             | 7.55E-03    | 6.04E-06         | P52272          | 1.58         | 1.62              | 1.47E-25    | 6.44E-24         |
| O14979          | 0.96         | 1.14              | 5.85E-10    | 1.13E-14         | P52306          | -0.35        | -0.62             | 7.56E-07    | 2.10E-14         |
| O14980          | 0.82         | 0.58              | 5.47E-10    | 1.88E-09         | P52565          | -1.10        | -0.65             | 1.38E-06    | 3.44E-04         |
| O15020          | 0.93         | 0.79              | 1.60E-12    | 8.94E-11         | P53396          | 0.23         | 0.18              | 8.51E-03    | 3.71E-02         |
| O15144          | -0.32        | -0.24             | 3.89E-04    | 8.92E-03         | P53680          | -1.09        | -1.15             | 1.73E-08    | 1.33E-10         |
| O15540          | 1.97         | 1.99              | 1.55E-06    | 3.31E-07         | P54289          | -1.40        | -1.44             | 3.23E-16    | 3.19E-15         |
| O43236          | 0.99         | 0.51              | 5.06E-08    | 9.96E-03         | P54578          | -1.26        | -1.15             | 4.21E-10    | 7.04E-10         |
| O43301          | -1.69        | -1.74             | 2.16E-40    | 1.92E-54         | P55084          | 0.45         | 0.63              | 3.11E-05    | 2.92E-05         |
| O43390          | 1.80         | 1.68              | 6.29E-26    | 1.98E-20         | P55087          | -1.04        | -1.01             | 4.46E-03    | 1.70E-03         |
| O43426          | -0.94        | -1.34             | 2.87E-08    | 6.03E-12         | P55209          | -0.97        | -0.85             | 4.01E-10    | 1.04E-08         |
| O43491          | -0.82        | -0.79             | 2.59E-09    | 2.18E-04         | P55786          | -0.32        | -0.47             | 4.87E-08    | 8.88E-15         |
| O43676          | -0.89        | -0.71             | 8.29E-05    | 3.31E-03         | P55795          | 2.04         | 2.28              | 6.39E-10    | 5.20E-11         |
| O43678          | -0.86        | -0.54             | 1.91E-03    | 9.73E-04         | P55809          | -0.85        | -0.78             | 3.52E-23    | 3.83E-18         |
| O43681          | -0.45        | -0.49             | 8.72E-06    | 7.98E-06         | P56134          | -0.37        | -0.27             | 2.42E-05    | 1.62E-02         |
| O43707          | -0.70        | -0.43             | 2.94E-06    | 1.27E-02         | P59998          | -0.58        | -0.72             | 5.44E-06    | 8.04E-05         |
| O43776          | -0.44        | -0.48             | 5.85E-03    | 1.20E-05         | P60033          | 1.13         | 0.98              | 1.63E-06    | 2.52E-04         |
| O43813          | -0.37        | -0.62             | 1.32E-03    | 5.63E-09         | P60174          | 0.60         | 0.36              | 3.88E-21    | 1.92E-06         |
| O43837          | -0.45        | -0.40             | 2.90E-05    | 3.42E-06         | P60201          | -0.61        | -1.51             | 2.78E-03    | 8.42E-13         |
| O43865          | 0.49         | 0.76              | 1.00E-05    | 4.10E-11         | P60660          | 0.71         | 0.85              | 8.29E-06    | 1.39E-04         |
| O43920          | -0.78        | -0.56             | 1.24E-04    | 2.01E-04         | P60709          | -0.76        | -0.62             | 6.33E-11    | 5.91E-10         |
| O60262          | -1.01        | -1.46             | 4.00E-05    | 6.30E-05         | P60880          | -0.71        | -1.36             | 1.87E-11    | 4.62E-29         |
| O60313          | -0.71        | -0.61             | 4.74E-08    | 4.16E-05         | P60953          | -0.67        | -0.70             | 4.19E-06    | 3.67E-09         |
| O60506          | 0.50         | 0.67              | 1.05E-05    | 1.09E-07         | P60981          | -0.30        | -0.31             | 1.40E-02    | 8.24E-04         |
| O60641          | -0.95        | -0.88             | 1.75E-14    | 1.90E-10         | P61019          | -0.72        | -0.74             | 9.77E-07    | 3.00E-06         |
| O60814          | 2.93         | 3.07              | 6.66E-39    | 1.73E-45         | P61088          | -0.53        | -0.62             | 2.28E-03    | 2.32E-04         |
| O60888          | 0.67         | 0.82              | 3.64E-02    | 1.35E-02         | P61106          | -0.51        | -0.45             | 8.06E-06    | 1.73E-08         |
| O75061          | -1.15        | -1.32             | 1.62E-14    | 1.53E-15         | P61158          | -0.52        | -0.66             | 2.67E-02    | 2.45E-04         |
| O75083          | -0.75        | -0.63             | 1.03E-18    | 2.45E-15         | P61163          | -1.30        | -1.41             | 5.79E-07    | 8.50E-06         |

|        |       |       |          |          |               |       |       |          |          |
|--------|-------|-------|----------|----------|---------------|-------|-------|----------|----------|
| O75122 | -0.71 | -0.91 | 2.06E-05 | 7.12E-08 | P61201        | -0.80 | -0.85 | 3.41E-08 | 3.28E-07 |
| O75251 | -0.69 | -0.55 | 8.67E-06 | 1.06E-03 | P61204        | -0.61 | -0.73 | 2.94E-06 | 3.78E-08 |
| O75306 | -1.00 | -0.48 | 8.77E-09 | 4.60E-04 | P61421        | -0.84 | -0.89 | 1.05E-09 | 2.60E-10 |
| O75323 | -0.53 | -0.35 | 1.11E-03 | 3.70E-03 | P61586        | -0.83 | -0.89 | 4.89E-04 | 2.15E-08 |
| O75367 | 3.25  | 3.32  | 5.98E-29 | 2.19E-28 | P61764        | -0.66 | -0.76 | 7.35E-17 | 7.18E-25 |
| O75390 | -0.38 | -0.33 | 2.61E-05 | 3.92E-05 | P61978        | 1.18  | 1.31  | 2.53E-15 | 5.13E-19 |
| O75475 | 2.77  | 2.59  | 1.41E-12 | 7.39E-13 | P61981        | -0.93 | -1.01 | 4.70E-26 | 2.94E-27 |
| O75489 | -1.12 | -0.76 | 3.73E-09 | 1.00E-09 | P62140        | -0.75 | -0.77 | 1.34E-10 | 1.16E-06 |
| O75506 | 0.43  | 0.48  | 8.14E-03 | 6.13E-03 | P62158        | -1.16 | -0.78 | 1.95E-11 | 3.07E-08 |
| O75508 | -1.39 | -2.33 | 1.90E-04 | 2.41E-06 | P62258        | -0.37 | -0.43 | 2.11E-07 | 1.83E-09 |
| O75746 | -0.41 | -0.55 | 3.00E-10 | 8.66E-15 | P62714        | -0.60 | -0.59 | 6.66E-05 | 3.54E-07 |
| O75781 | -2.15 | -1.88 | 2.04E-05 | 3.56E-06 | P62745        | -1.28 | -1.52 | 4.88E-12 | 4.23E-15 |
| O75947 | 0.69  | 0.72  | 8.21E-07 | 8.09E-07 | P62760        | -1.15 | -1.19 | 6.35E-13 | 9.91E-17 |
| O94760 | 0.36  | 0.15  | 8.32E-06 | 2.32E-02 | P62805        | 2.73  | 2.70  | 1.89E-24 | 1.60E-36 |
| O94811 | -2.19 | -2.46 | 7.98E-34 | 3.14E-27 | P62820        | -0.41 | -0.44 | 6.75E-04 | 2.57E-04 |
| O94819 | -0.92 | -1.39 | 1.84E-05 | 1.17E-05 | P62834        | -0.49 | -0.63 | 4.90E-05 | 3.86E-06 |
| O94826 | -1.20 | -1.20 | 1.17E-12 | 4.54E-12 | P62873        | -0.35 | -0.54 | 1.39E-07 | 9.60E-14 |
| O94856 | -0.65 | -1.10 | 1.14E-11 | 4.09E-18 | P62879        | -0.54 | -0.48 | 2.42E-04 | 8.23E-06 |
| O94925 | -1.21 | -1.10 | 1.12E-25 | 3.41E-24 | P63000        | -0.88 | -1.31 | 1.42E-03 | 9.66E-08 |
| O94973 | -0.94 | -0.81 | 4.72E-39 | 3.39E-37 | P63010        | -1.20 | -1.00 | 2.91E-27 | 6.35E-32 |
| O95292 | -0.89 | -1.23 | 2.61E-06 | 9.74E-12 | P63027        | -0.81 | -1.42 | 1.53E-02 | 3.04E-06 |
| O95299 | -0.72 | -0.32 | 8.20E-11 | 6.81E-06 | P63096        | -0.77 | -1.04 | 2.60E-05 | 3.72E-10 |
| O95319 | -0.67 | -0.48 | 3.31E-03 | 3.00E-02 | P63098        | -0.74 | -0.82 | 8.52E-09 | 4.38E-12 |
| O95670 | -0.68 | -1.23 | 9.77E-04 | 6.90E-04 | P63104        | -1.04 | -0.93 | 6.03E-12 | 4.42E-12 |
| O95674 | 0.58  | 0.56  | 1.59E-05 | 2.13E-07 | P63215        | -1.40 | -1.58 | 2.64E-04 | 3.07E-05 |
| O95782 | -1.41 | -1.37 | 2.95E-40 | 2.14E-37 | P67936        | 0.52  | 0.61  | 3.53E-02 | 2.00E-02 |
| O96000 | -1.01 | -0.72 | 2.83E-07 | 6.46E-06 | P68366        | -1.38 | -1.63 | 1.15E-27 | 1.64E-30 |
| P00338 | -0.35 | -0.44 | 1.92E-11 | 5.11E-11 | P68400        | -0.45 | -0.24 | 9.59E-03 | 2.24E-03 |
| P00352 | 3.04  | 2.55  | 1.70E-49 | 3.56E-32 | P68402        | 0.30  | 0.37  | 1.73E-02 | 2.95E-05 |
| P00367 | -1.23 | -1.08 | 1.33E-37 | 6.97E-34 | P68431        | 2.60  | 2.69  | 1.01E-29 | 3.31E-26 |
| P00395 | -0.62 | -0.54 | 2.60E-06 | 2.85E-04 | <b>P68871</b> | -0.34 | 0.64  | 1.79E-02 | 4.66E-04 |
| P00492 | -0.92 | -1.01 | 3.37E-24 | 7.52E-29 | <b>P69905</b> | -0.44 | 0.41  | 4.31E-04 | 3.29E-03 |
| P00505 | -0.51 | -0.28 | 2.78E-07 | 1.52E-05 | P78324        | -1.55 | -1.67 | 1.14E-23 | 2.20E-17 |
| P00558 | -0.10 | -0.14 | 3.34E-02 | 2.46E-05 | P78352        | -1.60 | -1.52 | 1.85E-11 | 2.01E-11 |
| P00918 | -1.13 | -0.55 | 2.72E-11 | 1.64E-02 | P78357        | -1.46 | -1.68 | 8.80E-13 | 2.70E-13 |
| P01834 | 0.92  | 1.43  | 7.79E-06 | 2.33E-05 | P78371        | -0.14 | -0.18 | 3.92E-02 | 1.31E-03 |
| P01857 | 0.43  | 1.05  | 1.71E-02 | 9.00E-05 | P78417        | -0.31 | -0.39 | 6.62E-04 | 5.22E-05 |
| P02545 | 0.78  | 0.97  | 1.16E-05 | 3.55E-03 | P78559        | -1.35 | -1.44 | 1.29E-29 | 3.67E-47 |
| P02647 | 1.73  | 2.30  | 3.82E-04 | 9.93E-04 | P80723        | -1.87 | -2.14 | 2.18E-30 | 2.95E-33 |
| P02686 | -0.90 | -1.02 | 4.87E-03 | 1.50E-07 | P84085        | -0.33 | -0.38 | 6.05E-04 | 1.39E-04 |
| P02730 | 0.50  | 1.49  | 4.23E-02 | 1.11E-05 | P99999        | -0.39 | -0.37 | 4.36E-03 | 1.27E-02 |
| P02768 | 0.30  | 0.84  | 1.86E-03 | 1.41E-17 | Q00610        | -0.84 | -0.70 | 1.21E-83 | 4.10E-85 |
| P02787 | -0.59 | -0.33 | 8.25E-06 | 1.25E-02 | Q00765        | -1.72 | -1.58 | 2.09E-12 | 1.59E-13 |

|        |       |       |          |          |        |       |       |          |          |
|--------|-------|-------|----------|----------|--------|-------|-------|----------|----------|
| P03905 | -0.75 | -0.61 | 9.94E-04 | 1.26E-04 | Q00839 | 1.60  | 1.77  | 4.50E-20 | 3.72E-37 |
| P04075 | -0.88 | -0.93 | 3.04E-20 | 1.51E-28 | Q01082 | -0.63 | -0.66 | 5.73E-56 | 2.69E-73 |
| P04179 | -0.58 | -0.32 | 7.01E-05 | 2.29E-02 | Q01105 | 0.80  | 1.24  | 2.84E-02 | 6.68E-06 |
| P04216 | -3.27 | -3.16 | 5.73E-20 | 5.96E-25 | Q01469 | 1.33  | 1.72  | 1.51E-07 | 9.30E-12 |
| P04264 | 1.07  | 0.56  | 1.27E-09 | 7.21E-03 | Q01484 | -0.37 | -0.65 | 1.54E-10 | 3.05E-23 |
| P04271 | 3.00  | 2.84  | 2.45E-16 | 7.02E-15 | Q01518 | -0.59 | -0.49 | 2.59E-13 | 1.31E-08 |
| P04350 | -0.58 | -0.93 | 2.56E-13 | 1.50E-27 | Q01813 | -0.83 | -1.16 | 3.29E-24 | 2.12E-34 |
| P04406 | -0.41 | -0.52 | 4.81E-08 | 3.02E-12 | Q01814 | -0.33 | -0.50 | 5.25E-10 | 3.69E-14 |
| P04632 | 0.77  | 0.53  | 5.40E-07 | 1.03E-02 | Q02218 | -0.59 | -0.43 | 3.09E-11 | 5.39E-05 |
| P04899 | -0.40 | -0.54 | 2.83E-04 | 6.51E-05 | Q02750 | -0.97 | -0.82 | 1.02E-04 | 1.83E-05 |
| P04908 | 2.90  | 2.84  | 3.21E-21 | 4.68E-21 | Q02790 | 0.91  | 0.58  | 1.87E-06 | 4.56E-04 |
| P05023 | -0.74 | -0.85 | 1.33E-20 | 3.18E-31 | Q02978 | -0.56 | -0.49 | 1.10E-06 | 1.78E-04 |
| P05026 | -1.13 | -1.29 | 1.11E-22 | 1.16E-23 | Q03252 | 2.31  | 2.35  | 1.02E-22 | 3.24E-23 |
| P05091 | -0.68 | -0.30 | 1.15E-11 | 5.53E-05 | Q04837 | 0.53  | 0.58  | 4.54E-02 | 6.87E-03 |
| P05141 | -0.52 | -0.47 | 7.02E-09 | 2.94E-09 | Q04917 | -0.72 | -0.65 | 1.53E-07 | 2.94E-05 |
| P05166 | 0.68  | 1.01  | 7.78E-10 | 1.12E-06 | Q05193 | -0.94 | -1.11 | 2.89E-26 | 7.89E-29 |
| P06748 | 1.74  | 2.01  | 2.16E-20 | 1.99E-21 | Q05329 | -1.26 | -1.37 | 1.49E-05 | 4.90E-04 |
| P07108 | 1.73  | 1.49  | 1.74E-17 | 1.89E-16 | Q05639 | -0.40 | -0.29 | 9.26E-07 | 1.34E-03 |
| P07195 | -0.22 | -0.32 | 3.03E-04 | 3.29E-06 | Q06124 | -0.74 | -0.90 | 5.94E-05 | 1.40E-08 |
| P07196 | -0.85 | -0.94 | 2.18E-18 | 2.44E-21 | Q07960 | -0.93 | -0.97 | 8.90E-06 | 1.97E-05 |
| P07197 | -0.98 | -1.02 | 4.29E-16 | 4.35E-21 | Q08209 | -1.23 | -1.40 | 6.09E-21 | 2.48E-24 |
| P07237 | 0.97  | 1.57  | 3.13E-06 | 3.05E-13 | Q08211 | 1.44  | 1.63  | 2.67E-23 | 5.19E-29 |
| P07305 | 3.20  | 3.23  | 5.79E-29 | 2.20E-28 | Q08722 | -0.74 | -1.11 | 3.06E-09 | 1.92E-09 |
| P07437 | -1.56 | -1.80 | 1.20E-36 | 3.26E-44 | Q10567 | -0.88 | -0.78 | 4.69E-42 | 1.56E-35 |
| P07737 | 0.76  | 0.76  | 2.80E-07 | 3.31E-08 | Q12860 | -0.80 | -1.01 | 3.46E-23 | 5.85E-33 |
| P07814 | -0.54 | -0.46 | 3.07E-05 | 1.14E-04 | Q12905 | 1.35  | 1.48  | 8.05E-18 | 1.02E-24 |
| P07900 | -0.17 | -0.47 | 2.54E-04 | 3.09E-26 | Q13200 | -1.11 | -0.90 | 3.49E-10 | 2.55E-12 |
| P07910 | 1.85  | 2.02  | 1.34E-21 | 4.73E-24 | Q13303 | -2.04 | -2.23 | 1.83E-12 | 8.44E-13 |
| P08107 | 0.28  | 0.56  | 7.42E-03 | 4.42E-09 | Q13367 | -0.53 | -0.71 | 1.91E-05 | 1.83E-04 |
| P08133 | -1.19 | -1.04 | 3.02E-25 | 8.12E-21 | Q13423 | -1.67 | -1.41 | 1.19E-34 | 3.45E-27 |
| P08195 | -0.85 | -0.70 | 7.10E-15 | 7.09E-16 | Q13509 | -1.52 | -1.59 | 6.93E-26 | 4.96E-32 |
| P08237 | -0.33 | -0.46 | 3.04E-04 | 8.57E-08 | Q13526 | -1.06 | -1.11 | 2.66E-03 | 4.12E-05 |
| P08238 | -0.29 | -0.49 | 1.05E-04 | 7.58E-14 | Q13555 | -1.66 | -2.01 | 1.50E-15 | 2.84E-20 |
| P08247 | -1.30 | -1.45 | 1.30E-09 | 9.26E-09 | Q13557 | 0.63  | 0.25  | 4.67E-05 | 4.52E-02 |
| P08559 | -0.99 | -0.98 | 1.51E-06 | 6.64E-09 | Q13642 | 0.42  | 0.29  | 5.76E-04 | 7.30E-03 |
| P08574 | -0.22 | -0.27 | 1.25E-02 | 1.69E-02 | Q13813 | -0.24 | -0.28 | 1.51E-09 | 9.89E-17 |
| P08758 | 0.40  | 0.81  | 3.84E-04 | 1.18E-06 | Q13825 | -0.75 | -0.41 | 2.31E-06 | 2.44E-02 |
| P08865 | 0.29  | 0.46  | 1.99E-03 | 2.17E-03 | Q13838 | 1.55  | 1.55  | 1.31E-13 | 8.01E-14 |
| P09104 | 0.45  | 0.19  | 1.56E-06 | 3.29E-02 | Q13885 | -1.12 | -1.31 | 8.09E-15 | 1.59E-14 |
| P09382 | 0.32  | 0.63  | 3.08E-02 | 4.50E-04 | Q14011 | 2.44  | 1.99  | 1.80E-07 | 8.05E-10 |
| P09417 | -0.65 | -1.17 | 1.24E-04 | 5.89E-10 | Q14019 | 0.40  | 0.51  | 4.93E-03 | 2.32E-03 |
| P09429 | 2.88  | 2.85  | 4.13E-15 | 1.58E-16 | Q14103 | 1.47  | 1.21  | 1.22E-05 | 1.64E-05 |
| P09471 | -0.85 | -1.03 | 6.47E-36 | 1.29E-33 | Q14141 | -0.71 | -0.66 | 1.54E-08 | 7.04E-04 |

|               |       |       |          |          |        |       |       |          |          |
|---------------|-------|-------|----------|----------|--------|-------|-------|----------|----------|
| P09496        | -0.49 | -0.35 | 1.07E-03 | 1.29E-02 | Q14194 | -0.85 | -0.97 | 3.04E-21 | 2.27E-23 |
| P09497        | -0.90 | -0.62 | 3.18E-08 | 6.04E-04 | Q14195 | -0.78 | -0.82 | 4.91E-13 | 4.83E-09 |
| P09543        | -1.06 | -1.65 | 1.52E-16 | 1.15E-40 | Q14203 | -0.73 | -0.96 | 1.80E-03 | 1.63E-06 |
| P09622        | -0.61 | -0.37 | 5.48E-07 | 7.29E-05 | Q14204 | -0.15 | -0.37 | 4.34E-06 | 1.37E-31 |
| P09651        | 2.00  | 2.23  | 3.95E-19 | 9.65E-26 | Q14643 | 3.72  | 3.66  | 1.61E-36 | 1.62E-28 |
| P09669        | -1.30 | -0.82 | 7.17E-06 | 3.84E-04 | Q14847 | -1.30 | -1.22 | 4.59E-11 | 3.27E-11 |
| P09936        | -0.89 | -0.93 | 2.10E-15 | 2.13E-18 | Q14894 | -0.65 | -0.46 | 2.22E-06 | 1.06E-04 |
| P09972        | 1.33  | 1.03  | 1.49E-39 | 1.18E-30 | Q15019 | -1.77 | -1.69 | 3.28E-22 | 1.82E-13 |
| POCG47        | 0.80  | 0.37  | 4.14E-06 | 4.24E-03 | Q15056 | 0.86  | 0.89  | 2.17E-03 | 4.05E-04 |
| P10412        | 3.44  | 3.31  | 4.65E-29 | 4.50E-30 | Q15102 | 1.95  | 2.17  | 5.84E-10 | 6.47E-11 |
| P10515        | -0.40 | -0.30 | 6.71E-03 | 4.65E-03 | Q15149 | -0.36 | -0.22 | 1.09E-08 | 6.08E-03 |
| P10636        | -1.57 | -2.10 | 1.33E-20 | 8.62E-26 | Q15181 | -1.10 | -1.35 | 3.68E-04 | 1.53E-04 |
| P10915        | -1.88 | -2.06 | 8.42E-09 | 2.72E-09 | Q15185 | 0.33  | 0.36  | 1.77E-02 | 1.04E-03 |
| P11021        | 0.27  | 0.47  | 1.09E-04 | 9.91E-07 | Q15257 | -0.50 | -0.41 | 5.73E-03 | 7.38E-06 |
| P11137        | -2.51 | -2.68 | 8.95E-48 | 2.23E-48 | Q15365 | 0.22  | 0.34  | 1.84E-05 | 2.93E-06 |
| P11142        | -0.34 | -0.46 | 1.11E-11 | 5.28E-20 | Q15366 | 0.28  | 0.45  | 2.68E-03 | 1.73E-10 |
| P11177        | -0.46 | -0.48 | 9.42E-07 | 3.33E-07 | Q15435 | -0.58 | -0.73 | 1.23E-13 | 3.59E-16 |
| P11216        | 0.61  | 0.45  | 1.33E-09 | 6.86E-08 | Q15555 | -1.19 | -1.40 | 1.22E-09 | 3.36E-10 |
| P11217        | -0.30 | -0.31 | 3.73E-02 | 3.88E-02 | Q15700 | -0.73 | -0.93 | 1.27E-10 | 1.13E-12 |
| P11233        | -0.80 | -1.07 | 5.89E-11 | 1.03E-14 | Q15717 | 3.01  | 2.97  | 1.10E-12 | 6.80E-15 |
| P11586        | -1.47 | -1.25 | 2.45E-09 | 4.17E-05 | Q16143 | -0.88 | -1.53 | 6.86E-04 | 3.84E-08 |
| P11766        | -0.37 | -0.34 | 4.25E-04 | 6.01E-04 | Q16181 | -0.91 | -0.93 | 3.21E-07 | 4.11E-09 |
| P11940        | 0.35  | 0.43  | 1.00E-02 | 2.13E-03 | Q16352 | -0.77 | -1.29 | 3.02E-12 | 1.23E-29 |
| P12111        | 0.88  | 1.29  | 1.54E-02 | 3.03E-02 | Q16531 | 0.39  | 0.22  | 2.92E-05 | 4.53E-02 |
| P12236        | 0.73  | 0.85  | 3.28E-03 | 2.63E-07 | Q16543 | -0.47 | -0.48 | 1.90E-03 | 6.23E-04 |
| P12532        | 0.45  | 0.42  | 4.96E-06 | 1.65E-05 | Q16555 | -0.47 | -0.81 | 3.42E-13 | 5.24E-31 |
| P12956        | 1.75  | 1.83  | 1.31E-21 | 2.30E-22 | Q16566 | 1.65  | 1.22  | 6.69E-06 | 2.49E-04 |
| P13010        | 1.82  | 1.91  | 2.71E-20 | 5.35E-23 | Q16623 | -3.22 | -2.82 | 7.89E-13 | 5.28E-10 |
| P13073        | -1.02 | -1.05 | 2.24E-09 | 1.86E-13 | Q16658 | -2.51 | -2.50 | 3.44E-36 | 5.94E-32 |
| P13489        | 0.32  | 0.39  | 8.35E-04 | 2.26E-06 | Q16774 | -0.27 | -0.27 | 7.70E-03 | 3.66E-02 |
| P13591        | -0.55 | -0.65 | 6.24E-14 | 9.21E-14 | Q16795 | -0.61 | -0.41 | 9.61E-07 | 1.55E-05 |
| <b>P13611</b> | 0.53  | -0.71 | 1.18E-03 | 9.23E-04 | Q16798 | -0.65 | -0.95 | 2.40E-04 | 1.75E-05 |
| P13637        | -0.56 | -0.92 | 3.04E-15 | 7.75E-20 | Q16799 | -0.92 | -1.03 | 3.39E-07 | 3.75E-15 |
| P13639        | -0.30 | -0.23 | 1.18E-07 | 2.85E-05 | Q16864 | -0.95 | -1.22 | 2.66E-05 | 6.67E-08 |
| P13693        | -0.77 | -0.83 | 2.83E-04 | 5.51E-08 | Q16891 | -0.49 | -0.36 | 1.72E-08 | 1.73E-05 |
| P13804        | 0.37  | 0.73  | 7.45E-03 | 6.04E-06 | Q53GQ0 | 0.38  | 0.38  | 4.44E-03 | 4.60E-02 |
| P14136        | 1.38  | 0.79  | 1.04E-12 | 5.27E-05 | Q5SSJ5 | 1.97  | 1.96  | 1.12E-13 | 7.48E-15 |
| P14314        | 0.56  | 0.82  | 1.79E-03 | 5.34E-04 | Q6P587 | -0.54 | -0.45 | 3.98E-08 | 2.08E-04 |
| P14415        | 0.74  | 0.58  | 1.44E-06 | 8.70E-03 | Q6UWR7 | -1.03 | -1.48 | 1.94E-05 | 4.15E-12 |
| P14618        | -0.31 | -0.41 | 1.54E-06 | 5.36E-14 | Q71U36 | -0.58 | -0.91 | 3.17E-15 | 1.27E-42 |
| P14625        | -0.43 | -0.29 | 9.44E-05 | 2.98E-02 | Q7L0J3 | -1.62 | -1.58 | 7.05E-13 | 4.60E-11 |
| P14866        | 1.49  | 1.79  | 9.41E-20 | 1.32E-27 | Q7Z3B1 | -1.37 | -1.78 | 5.99E-10 | 9.48E-08 |
| P15104        | -1.49 | -1.24 | 1.02E-20 | 3.36E-13 | Q7Z3D6 | 0.57  | 0.67  | 3.99E-02 | 1.54E-02 |

|        |       |       |          |          |        |       |       |          |          |
|--------|-------|-------|----------|----------|--------|-------|-------|----------|----------|
| P16298 | -1.44 | -1.53 | 9.75E-10 | 5.51E-08 | Q7Z4S6 | -0.76 | -0.59 | 2.57E-02 | 1.45E-02 |
| P16615 | -0.60 | -0.69 | 2.95E-14 | 1.90E-22 | Q7Z6L0 | -0.55 | -1.28 | 2.09E-03 | 4.07E-06 |
| P17174 | -1.02 | -1.15 | 8.40E-33 | 2.11E-34 | Q86Y82 | -0.53 | -0.58 | 2.23E-03 | 2.53E-04 |
| P17600 | -1.13 | -1.49 | 1.19E-50 | 6.37E-48 | Q8IXJ6 | -1.10 | -1.63 | 5.21E-10 | 3.55E-20 |
| P17655 | 0.34  | 0.58  | 6.67E-04 | 1.25E-05 | Q8N111 | -0.70 | -0.58 | 9.46E-07 | 1.79E-08 |
| P17677 | -1.41 | -1.91 | 2.34E-10 | 7.79E-11 | Q8N126 | 0.73  | 0.48  | 6.86E-07 | 9.10E-07 |
| P17858 | -0.55 | -0.47 | 4.87E-06 | 9.07E-05 | Q8N3J6 | -1.43 | -1.70 | 1.09E-08 | 3.89E-10 |
| P18669 | -0.26 | -0.28 | 4.80E-05 | 1.49E-06 | Q8N573 | -1.51 | -1.79 | 1.68E-11 | 1.35E-12 |
| P18859 | 0.94  | 0.96  | 1.33E-02 | 2.58E-03 | Q8NCW5 | -0.53 | -0.34 | 3.13E-09 | 2.36E-05 |
| P19086 | -0.68 | -0.82 | 1.56E-03 | 7.10E-03 | Q8WUM4 | -1.23 | -0.91 | 2.70E-03 | 8.59E-06 |
| P19338 | 0.62  | 0.98  | 3.84E-02 | 5.50E-05 | Q8WXF7 | -1.62 | -1.70 | 4.30E-21 | 1.44E-31 |
| P19367 | -0.53 | -0.72 | 9.41E-29 | 6.24E-40 | Q92499 | 0.73  | 0.77  | 5.53E-10 | 8.62E-11 |
| P20020 | -1.86 | -1.84 | 5.54E-38 | 1.98E-24 | Q92561 | -0.33 | -0.26 | 1.52E-04 | 4.37E-02 |
| P21281 | -1.07 | -1.16 | 6.69E-24 | 5.53E-30 | Q92597 | -1.69 | -1.44 | 5.98E-17 | 7.48E-08 |
| P21283 | -0.84 | -1.05 | 1.16E-09 | 1.44E-12 | Q92598 | -1.97 | -2.45 | 6.90E-25 | 2.37E-21 |
| P21579 | -1.19 | -1.07 | 1.59E-24 | 3.51E-33 | Q92777 | -0.91 | -0.99 | 6.43E-26 | 5.55E-19 |
| P21796 | -0.94 | -0.91 | 1.05E-15 | 1.01E-22 | Q92823 | -0.83 | -1.15 | 2.08E-32 | 4.31E-29 |
| P21926 | -1.10 | -0.86 | 7.18E-04 | 3.72E-03 | Q92841 | 1.83  | 1.65  | 5.40E-11 | 4.81E-10 |
| P21964 | 0.36  | 0.64  | 6.87E-03 | 2.39E-03 | Q92945 | 1.59  | 1.79  | 2.82E-04 | 9.93E-10 |
| P22061 | -0.77 | -0.52 | 1.51E-02 | 1.52E-08 | Q93050 | -1.07 | -1.00 | 9.53E-17 | 2.03E-16 |
| P22392 | -0.82 | -0.55 | 4.15E-10 | 8.63E-07 | Q96AB3 | -0.87 | -0.41 | 8.97E-14 | 9.83E-03 |
| P22626 | 1.76  | 1.69  | 7.38E-18 | 1.04E-25 | Q96BM9 | -1.38 | -1.30 | 1.28E-05 | 1.40E-11 |
| P22676 | 5.12  | 5.24  | 9.19E-11 | 3.72E-15 | Q96C19 | -0.62 | -0.52 | 4.55E-02 | 1.36E-02 |
| P23246 | 2.23  | 2.24  | 9.52E-16 | 1.43E-16 | Q96CW1 | -1.01 | -0.98 | 8.22E-24 | 3.47E-32 |
| P23381 | -0.82 | -0.66 | 3.26E-03 | 1.85E-03 | Q96E17 | -1.64 | -1.82 | 1.37E-10 | 5.12E-09 |
| P23526 | -1.04 | -1.17 | 1.36E-10 | 1.13E-08 | Q96F07 | -0.84 | -0.83 | 1.81E-10 | 1.28E-16 |
| P23528 | -0.27 | -0.47 | 3.37E-02 | 1.59E-04 | Q96FC7 | -0.39 | -0.93 | 2.21E-06 | 1.48E-08 |
| P23634 | -0.97 | -1.17 | 9.20E-14 | 4.18E-13 | Q96GD0 | -1.22 | -1.12 | 7.83E-04 | 3.42E-03 |
| P24534 | 0.28  | 0.31  | 1.39E-02 | 2.01E-03 | Q96GW7 | -1.26 | -1.57 | 2.09E-12 | 2.76E-11 |
| P24539 | -0.30 | -0.31 | 4.78E-03 | 2.19E-03 | Q96JE9 | -1.35 | -1.56 | 5.80E-11 | 2.94E-11 |
| P25398 | 0.61  | 0.61  | 2.05E-04 | 1.12E-03 | Q96KP4 | -0.54 | -0.59 | 6.44E-05 | 1.09E-04 |
| P25705 | -0.39 | -0.27 | 3.80E-14 | 2.01E-08 | Q96QK1 | -0.59 | -0.54 | 6.54E-11 | 1.61E-08 |
| P25789 | -0.47 | -0.28 | 5.16E-07 | 7.08E-04 | Q99497 | 0.34  | 0.61  | 1.10E-02 | 1.82E-07 |
| P26038 | 0.70  | 0.93  | 4.14E-02 | 1.63E-02 | Q99623 | -0.77 | -0.59 | 4.64E-15 | 1.72E-10 |
| P26232 | -1.45 | -1.53 | 3.74E-15 | 3.05E-14 | Q99714 | 0.45  | 0.73  | 7.41E-08 | 1.87E-13 |
| P26641 | 0.45  | 0.41  | 1.79E-02 | 2.53E-02 | Q99719 | -1.50 | -1.64 | 1.26E-30 | 5.69E-25 |
| P27338 | -0.90 | -0.80 | 1.79E-06 | 3.68E-03 | Q99747 | -0.46 | -0.78 | 4.73E-06 | 2.02E-06 |
| P27361 | -0.57 | -0.89 | 4.49E-03 | 7.88E-06 | Q99798 | -0.27 | -0.27 | 7.34E-06 | 5.36E-09 |
| P27449 | -0.86 | -0.66 | 3.44E-06 | 5.62E-05 | Q99961 | -1.49 | -1.31 | 1.84E-06 | 2.75E-04 |
| P27695 | 1.82  | 1.84  | 6.33E-22 | 9.80E-23 | Q99963 | -1.04 | -1.01 | 1.14E-09 | 5.56E-09 |
| P27797 | 0.79  | 1.09  | 7.97E-11 | 3.19E-13 | Q9BPU6 | -0.66 | -0.95 | 9.03E-05 | 4.44E-07 |
| P28331 | -0.57 | -0.24 | 1.30E-11 | 4.74E-05 | Q9BRX8 | -1.13 | -0.99 | 9.19E-11 | 2.86E-06 |
| P29401 | 0.70  | 0.55  | 1.24E-31 | 1.60E-21 | Q9BT78 | -0.22 | -0.23 | 2.77E-02 | 9.87E-04 |



|        |       |       |          |          |        |       |       |          |          |
|--------|-------|-------|----------|----------|--------|-------|-------|----------|----------|
| P29966 | 0.87  | 0.91  | 5.15E-07 | 4.31E-11 | Q9BWM7 | 0.94  | 0.60  | 6.68E-10 | 6.61E-05 |
| P30042 | -0.81 | -0.53 | 1.08E-09 | 1.58E-06 | Q9BY11 | -1.71 | -1.83 | 1.09E-20 | 1.89E-19 |
| P30044 | 0.45  | 0.51  | 2.40E-07 | 4.10E-08 | Q9C040 | -0.39 | -0.56 | 7.04E-05 | 4.51E-07 |
| P30084 | -0.95 | -0.37 | 3.83E-09 | 2.42E-02 | Q9H115 | -0.30 | -0.69 | 9.08E-04 | 2.74E-09 |
| P30101 | 0.48  | 0.81  | 4.01E-10 | 1.43E-14 | Q9H492 | -1.24 | -1.03 | 2.45E-07 | 6.49E-05 |
| P30153 | -0.55 | -0.67 | 5.88E-15 | 1.16E-20 | Q9H4G0 | -1.04 | -1.33 | 5.33E-12 | 5.86E-18 |
| P30531 | -1.51 | -1.59 | 3.33E-06 | 8.40E-06 | Q9H7Z7 | -0.47 | -0.29 | 1.39E-02 | 3.82E-02 |
| P31040 | -1.49 | -1.17 | 2.07E-12 | 3.58E-11 | Q9H8H3 | 0.69  | 0.95  | 2.24E-04 | 4.91E-03 |
| P31146 | -1.90 | -1.69 | 4.85E-16 | 4.64E-11 | Q9H936 | -1.05 | -1.02 | 3.28E-10 | 5.55E-08 |
| P31150 | -0.34 | -0.51 | 1.61E-05 | 7.14E-12 | Q9H9B4 | -0.53 | -0.52 | 1.46E-07 | 9.11E-08 |
| P31153 | 0.48  | 0.36  | 9.68E-05 | 1.42E-03 | Q9HCJ6 | 4.69  | 3.81  | 7.66E-10 | 1.12E-19 |
| P31689 | -0.74 | -0.84 | 1.22E-06 | 1.01E-07 | Q9HDC9 | 0.70  | 0.75  | 8.07E-07 | 1.91E-07 |
| P31930 | -0.34 | -0.22 | 4.71E-05 | 5.86E-03 | Q9NP72 | -0.33 | -0.45 | 8.09E-03 | 6.91E-04 |
| P31937 | 0.41  | 0.96  | 8.85E-04 | 1.18E-06 | Q9NP97 | 0.38  | 0.42  | 2.05E-02 | 4.25E-03 |
| P31943 | 1.30  | 1.47  | 5.86E-10 | 1.88E-09 | Q9NPJ3 | -1.30 | -1.14 | 1.18E-10 | 2.98E-06 |
| P31946 | -0.49 | -0.49 | 1.09E-03 | 1.08E-04 | Q9NQC3 | -1.06 | -1.21 | 1.28E-12 | 2.25E-17 |
| P31948 | 0.48  | 0.31  | 5.95E-06 | 2.40E-08 | Q9NQX3 | -1.13 | -0.66 | 1.44E-06 | 8.13E-04 |
| P32004 | 0.54  | 0.61  | 4.08E-09 | 5.94E-09 | Q9NS86 | -0.95 | -1.49 | 6.29E-04 | 7.46E-06 |
| P32119 | 0.32  | 0.57  | 2.96E-03 | 1.23E-07 | Q9NSD9 | -0.67 | -0.74 | 1.58E-10 | 1.46E-09 |
| P34932 | -0.75 | -0.79 | 5.16E-15 | 5.69E-17 | Q9NTK5 | -0.22 | -0.32 | 2.95E-02 | 3.10E-04 |
| P35222 | -0.39 | -0.22 | 6.57E-05 | 6.97E-03 | Q9NVA2 | -1.40 | -1.23 | 1.19E-28 | 5.29E-26 |
| P35232 | -0.94 | -0.43 | 1.11E-06 | 7.15E-04 | Q9NX63 | -0.37 | -0.26 | 2.31E-03 | 9.40E-03 |
| P35527 | 0.69  | 0.49  | 1.19E-03 | 4.31E-02 | Q9NYI0 | 1.38  | 0.81  | 9.06E-14 | 3.96E-05 |
| P35580 | -0.81 | -0.44 | 8.93E-09 | 1.29E-03 | Q9NZ45 | -0.82 | -0.91 | 1.41E-11 | 1.53E-14 |
| P35611 | -0.69 | -0.70 | 1.34E-10 | 2.50E-10 | Q9NZJ7 | -0.86 | -0.40 | 1.46E-03 | 4.61E-03 |
| P35612 | -1.13 | -1.13 | 4.61E-13 | 3.16E-18 | Q9NZN3 | -1.77 | -1.85 | 1.24E-17 | 3.00E-10 |
| P35613 | -0.82 | -0.75 | 7.34E-10 | 1.01E-05 | Q9NZR1 | -0.43 | -0.49 | 3.72E-06 | 1.33E-07 |
| P36542 | -0.42 | -0.31 | 1.21E-06 | 5.29E-06 | Q9POL0 | -0.41 | -0.45 | 1.35E-04 | 1.20E-03 |
| P36543 | -0.94 | -0.92 | 7.18E-08 | 8.48E-12 | Q9P2R7 | -0.30 | -0.46 | 1.53E-04 | 6.48E-07 |
| P37837 | 1.83  | 1.20  | 1.06E-22 | 8.09E-17 | Q9P2U7 | -0.92 | -1.19 | 1.19E-11 | 1.11E-09 |
| P37840 | -0.66 | -0.96 | 8.32E-04 | 8.58E-06 | Q9UBB6 | -1.51 | -1.55 | 3.87E-48 | 6.30E-37 |
| P38117 | -0.63 | -0.49 | 6.09E-05 | 1.37E-04 | Q9UEY8 | 0.52  | 0.31  | 2.52E-06 | 1.17E-02 |
| P38606 | -0.76 | -0.89 | 1.50E-16 | 2.74E-23 | Q9UH03 | -1.06 | -1.17 | 2.90E-20 | 8.49E-17 |
| P39687 | 1.72  | 1.75  | 2.72E-07 | 4.05E-08 | Q9UI12 | -0.96 | -1.15 | 7.57E-18 | 8.15E-19 |
| P40123 | -2.41 | -2.24 | 3.66E-12 | 1.18E-13 | Q9UI15 | -0.93 | -1.07 | 5.79E-08 | 5.52E-13 |
| P40925 | -0.90 | -1.06 | 5.23E-19 | 1.09E-20 | Q9UKA9 | 1.46  | 1.19  | 7.99E-13 | 4.07E-09 |
| P40926 | -1.01 | -0.92 | 8.44E-49 | 1.73E-42 | Q9UKU0 | -0.54 | -0.73 | 8.52E-06 | 9.17E-05 |
| P40939 | 0.46  | 0.70  | 6.94E-08 | 4.37E-12 | Q9ULD0 | -0.48 | -0.42 | 8.29E-05 | 1.46E-03 |
| P41250 | -0.31 | -0.50 | 2.83E-05 | 9.99E-12 | Q9ULU8 | -0.74 | -0.84 | 7.74E-09 | 3.65E-05 |
| P42025 | -0.85 | -1.08 | 1.86E-11 | 3.40E-13 | Q9UM19 | 0.67  | 0.56  | 5.75E-06 | 1.72E-03 |
| P42658 | -1.01 | -0.93 | 1.94E-07 | 1.01E-02 | Q9UN36 | 1.18  | 1.01  | 6.19E-16 | 5.64E-12 |
| P43003 | 0.73  | 1.21  | 1.55E-03 | 7.86E-07 | Q9UN86 | -1.16 | -0.99 | 4.50E-09 | 2.86E-10 |
| P43004 | -3.49 | -3.46 | 1.83E-20 | 2.98E-15 | Q9UPA5 | -1.70 | -2.37 | 6.62E-09 | 2.52E-07 |

|        |       |       |          |          |        |       |       |          |          |
|--------|-------|-------|----------|----------|--------|-------|-------|----------|----------|
| P43034 | -0.31 | -0.40 | 6.40E-04 | 6.73E-05 | Q9UPN3 | 0.36  | 0.62  | 1.06E-02 | 2.89E-03 |
| P43121 | 2.85  | 2.61  | 1.69E-10 | 9.20E-10 | Q9UPR5 | 0.63  | 0.55  | 6.38E-08 | 2.21E-04 |
| P43243 | 1.81  | 1.80  | 2.37E-39 | 4.46E-37 | Q9UPY8 | -0.86 | -0.90 | 4.84E-07 | 1.77E-09 |
| P43304 | 0.56  | 0.41  | 2.49E-06 | 2.85E-03 | Q9UQ16 | 0.65  | 0.21  | 3.03E-11 | 3.99E-02 |
| P46459 | -0.96 | -1.07 | 3.27E-43 | 1.01E-53 | Q9UQ80 | 0.55  | 0.47  | 8.75E-07 | 5.77E-05 |
| P46821 | -0.42 | -0.76 | 5.96E-09 | 3.54E-25 | Q9UQB3 | -0.97 | -1.16 | 3.57E-06 | 4.61E-07 |
| P47755 | -0.43 | -0.42 | 3.72E-05 | 3.82E-08 | Q9UQM7 | -3.64 | -3.77 | 5.13E-36 | 4.21E-34 |
| P47756 | -0.49 | -0.58 | 9.23E-06 | 4.29E-08 | Q9Y224 | 1.25  | 1.45  | 2.52E-10 | 4.09E-10 |
| P48047 | -0.41 | -0.24 | 2.77E-06 | 1.38E-03 | Q9Y266 | -0.74 | -0.64 | 1.04E-05 | 9.02E-05 |
| P48147 | -1.50 | -1.50 | 2.34E-09 | 8.54E-09 | Q9Y277 | -0.51 | -0.51 | 1.13E-13 | 2.57E-19 |
| P48556 | -0.43 | -0.47 | 1.18E-03 | 4.36E-04 | Q9Y281 | -0.35 | -0.47 | 5.13E-03 | 1.23E-03 |
| P48643 | -0.36 | -0.35 | 2.10E-06 | 2.60E-06 | Q9Y285 | -0.97 | -1.14 | 2.12E-06 | 3.58E-08 |
| P48735 | -1.20 | -0.74 | 2.76E-36 | 4.28E-12 | Q9Y2A7 | -0.61 | -0.76 | 1.55E-04 | 1.17E-07 |
| P49189 | 0.41  | 0.43  | 1.98E-05 | 5.41E-06 | Q9Y2J2 | -0.70 | -1.02 | 6.69E-25 | 1.61E-31 |
| P49368 | -0.21 | -0.20 | 1.95E-03 | 1.85E-03 | Q9Y2J8 | -0.84 | -1.00 | 5.44E-07 | 1.72E-07 |
| P49411 | -0.25 | -0.17 | 2.27E-02 | 3.57E-02 | Q9Y4I1 | -0.93 | -1.04 | 2.91E-11 | 1.29E-12 |
| P49418 | -1.03 | -1.37 | 2.32E-10 | 3.23E-15 | Q9Y5K8 | -1.06 | -1.26 | 1.93E-10 | 4.69E-08 |
| P49419 | -0.75 | -0.73 | 1.31E-18 | 2.60E-12 | Q9Y6I7 | -0.31 | -0.63 | 1.25E-04 | 5.02E-06 |
| P49588 | -0.40 | -0.55 | 5.49E-07 | 2.54E-17 | Q9Y639 | -0.86 | -0.56 | 3.11E-05 | 1.58E-04 |
| P49758 | -1.67 | -1.65 | 6.47E-11 | 1.57E-07 | Q9Y6I3 | -1.15 | -0.98 | 7.57E-06 | 4.99E-08 |
| P49821 | -0.57 | -0.41 | 8.90E-11 | 1.80E-06 | Q9Y6R1 | 1.00  | 0.65  | 1.16E-05 | 1.71E-02 |
| P50213 | -0.52 | -0.44 | 2.89E-05 | 1.38E-05 | -      | -     | -     | -        | -        |

Supplementary Table 4. Non-FDR adjusted enriched IPA-generated canonical pathways for BA19 and Cerebellum. An enrichment of 1.3 or greater represents a p-value < 0.05.

| <b>CANONICAL PATHWAYS - BA19</b>                       | <b>Enrichment</b> |
|--------------------------------------------------------|-------------------|
| FXR/RXR Activation                                     | 3.81              |
| Glutamate Receptor Signaling                           | 3.72              |
| Clathrin-mediated Endocytosis Signaling                | 3.59              |
| Heme Degradation                                       | 3.28              |
| Sertoli Cell-Sertoli Cell Junction Signaling           | 3.17              |
| Glutathione-mediated Detoxification                    | 3.09              |
| Phagosome Maturation                                   | 2.9               |
| LXR/RXR Activation                                     | 2.82              |
| Signaling by Rho Family GTPases                        | 2.76              |
| Acute Phase Response Signaling                         | 2.67              |
| Remodeling of Epithelial Adherens Junctions            | 2.54              |
| Pentose Phosphate Pathway                              | 2.52              |
| EIF2 Signaling                                         | 2.47              |
| Calcium Signaling                                      | 2.44              |
| RhoA Signaling                                         | 2.37              |
| tRNA Charging                                          | 2.24              |
| Pyrimidine Ribonucleotides Interconversion             | 2.24              |
| Glucocorticoid Receptor Signaling                      | 2.23              |
| Pyrimidine Ribonucleotides De Novo Biosynthesis        | 2.18              |
| Huntington's Disease Signaling                         | 2.17              |
| nNOS Signaling in Neurons                              | 2.09              |
| Acetyl-CoA Biosynthesis III (from Citrate)             | 2.03              |
| Pyrimidine Deoxyribonucleotides De Novo Biosynthesis I | 1.83              |
| Methionine Degradation I (to Homocysteine)             | 1.83              |
| Protein Kinase A Signaling                             | 1.82              |
| Mitochondrial Dysfunction                              | 1.78              |
| Germ Cell-Sertoli Cell Junction Signaling              | 1.78              |
| Amyotrophic Lateral Sclerosis Signaling                | 1.75              |
| Cysteine Biosynthesis III (mammalia)                   | 1.75              |
| Palmitate Biosynthesis I (Animals)                     | 1.73              |
| Ascorbate Recycling (Cytosolic)                        | 1.73              |
| Fatty Acid Biosynthesis Initiation II                  | 1.73              |
| Arginine Degradation I (Arginase Pathway)              | 1.73              |
| Formaldehyde Oxidation II (Glutathione-dependent)      | 1.73              |
| Synaptic Long Term Potentiation                        | 1.67              |
| LPS/IL-1 Mediated Inhibition of RXR Function           | 1.65              |
| Xenobiotic Metabolism Signaling                        | 1.64              |
| Gap Junction Signaling                                 | 1.61              |
| NRF2-mediated Oxidative Stress Response                | 1.59              |

|                                                                           |                   |
|---------------------------------------------------------------------------|-------------------|
| Complement System                                                         | 1.58              |
| Protein Ubiquitination Pathway                                            | 1.57              |
| Pyruvate Fermentation to Lactate                                          | 1.55              |
| S-adenosyl-L-methionine Biosynthesis                                      | 1.55              |
| Role of NFAT in Cardiac Hypertrophy                                       | 1.55              |
| Sirtuin Signaling Pathway                                                 | 1.48              |
| Aryl Hydrocarbon Receptor Signaling                                       | 1.48              |
| Epithelial Adherens Junction Signaling                                    | 1.47              |
| Arsenate Detoxification I (Glutaredoxin)                                  | 1.43              |
| Proline Biosynthesis II (from Arginine)                                   | 1.43              |
| Pentose Phosphate Pathway (Oxidative Branch)                              | 1.43              |
| Arginine Degradation VI (Arginase 2 Pathway)                              | 1.43              |
| Stearate Biosynthesis I (Animals)                                         | 1.42              |
| Superpathway of Methionine Degradation                                    | 1.42              |
| Salvage Pathways of Pyrimidine Ribonucleotides                            | 1.36              |
| Arginine Biosynthesis IV                                                  | 1.34              |
| Serine Biosynthesis                                                       | 1.34              |
| Pentose Phosphate Pathway (Non-oxidative Branch)                          | 1.34              |
| Citrulline Biosynthesis                                                   | 1.34              |
| <b>CANONICAL PATHWAYS - Cerebellum</b>                                    | <b>Enrichment</b> |
| Fatty Acid $\beta$ -oxidation I                                           | 9.47              |
| Glutaryl-CoA Degradation                                                  | 8.35              |
| Tryptophan Degradation III (Eukaryotic)                                   | 7.51              |
| Isoleucine Degradation I                                                  | 6.75              |
| Valine Degradation I                                                      | 6.19              |
| Ketolysis                                                                 | 6.16              |
| Aryl Hydrocarbon Receptor Signaling                                       | 4.59              |
| Calcium Signaling                                                         | 3.93              |
| Xenobiotic Metabolism Signaling                                           | 3.9               |
| Calcium Transport I                                                       | 3.87              |
| Phagosome Maturation                                                      | 3.83              |
| Ketogenesis                                                               | 3.71              |
| Amyotrophic Lateral Sclerosis Signaling                                   | 3.54              |
| NRF2-mediated Oxidative Stress Response                                   | 3.53              |
| Ethanol Degradation II                                                    | 3.48              |
| Mevalonate Pathway I                                                      | 3.46              |
| Noradrenaline and Adrenaline Degradation                                  | 3.31              |
| 14-3-3-mediated Signaling                                                 | 3.21              |
| Superpathway of Geranylgeranyldiphosphate Biosynthesis I (via Mevalonate) | 3.15              |
| LXR/RXR Activation                                                        | 3.15              |
| Parkinson's Signaling                                                     | 3.07              |
| LPS/IL-1 Mediated Inhibition of RXR Function                              | 2.96              |

|                                                        |      |
|--------------------------------------------------------|------|
| Melatonin Signaling                                    | 2.93 |
| Pyrimidine Deoxyribonucleotides De Novo Biosynthesis I | 2.78 |
| Tryptophan Degradation X (Mammalian, via Tryptamine)   | 2.78 |
| Glutathione-mediated Detoxification                    | 2.78 |
| nNOS Signaling in Neurons                              | 2.72 |
| Ethanol Degradation IV                                 | 2.71 |
| Serotonin Degradation                                  | 2.69 |
| Synaptic Long Term Potentiation                        | 2.63 |
| PI3K Signaling in B Lymphocytes                        | 2.56 |
| PPAR $\alpha$ /RXR $\alpha$ Activation                 | 2.49 |
| Calcium-induced T Lymphocyte Apoptosis                 | 2.49 |
| Superpathway of Cholesterol Biosynthesis               | 2.39 |
| Glutamate Receptor Signaling                           | 2.31 |
| CREB Signaling in Neurons                              | 2.25 |
| Role of NFAT in Cardiac Hypertrophy                    | 2.2  |
| Remodeling of Epithelial Adherens Junctions            | 2.16 |
| Granzyme A Signaling                                   | 2.13 |
| Neuropathic Pain Signaling In Dorsal Horn Neurons      | 2.01 |
| Aldosterone Signaling in Epithelial Cells              | 1.99 |
| GM-CSF Signaling                                       | 1.98 |
| Pyrimidine Ribonucleotides Interconversion             | 1.94 |
| Mitochondrial Dysfunction                              | 1.91 |
| Pyrimidine Ribonucleotides De Novo Biosynthesis        | 1.88 |
| Histamine Degradation                                  | 1.81 |
| B Cell Receptor Signaling                              | 1.81 |
| Lipid Antigen Presentation by CD1                      | 1.76 |
| Oxidative Ethanol Degradation III                      | 1.76 |
| Salvage Pathways of Pyrimidine Ribonucleotides         | 1.75 |
| Apoptosis Signaling                                    | 1.73 |
| Amyloid Processing                                     | 1.72 |
| Gap Junction Signaling                                 | 1.72 |
| Synaptic Long Term Depression                          | 1.72 |
| FXR/RXR Activation                                     | 1.7  |
| Glutathione Redox Reactions I                          | 1.67 |
| Putrescine Degradation III                             | 1.67 |
| Fatty Acid $\alpha$ -oxidation                         | 1.67 |
| Semaphorin Signaling in Neurons                        | 1.65 |
| Unfolded protein response                              | 1.63 |
| Huntington's Disease Signaling                         | 1.63 |
| TCA Cycle II (Eukaryotic)                              | 1.62 |
| $\beta$ -alanine Degradation I                         | 1.62 |
| Phenylethylamine Degradation I                         | 1.62 |
| Palmitate Biosynthesis I (Animals)                     | 1.62 |

|                                                                                |      |
|--------------------------------------------------------------------------------|------|
| Thyroid Hormone Biosynthesis                                                   | 1.62 |
| Fatty Acid Biosynthesis Initiation II                                          | 1.62 |
| Fatty Acid $\beta$ -oxidation III (Unsaturated, Odd Number)                    | 1.62 |
| GNRH Signaling                                                                 | 1.61 |
| Thrombin Signaling                                                             | 1.61 |
| TR/RXR Activation                                                              | 1.57 |
| Acute Phase Response Signaling                                                 | 1.56 |
| Breast Cancer Regulation by Stathmin1                                          | 1.51 |
| Dopamine Degradation                                                           | 1.48 |
| Trehalose Degradation II (Trehalase)                                           | 1.45 |
| D-glucuronate Degradation I                                                    | 1.45 |
| Glycerol-3-phosphate Shuttle                                                   | 1.45 |
| Lactose Degradation III                                                        | 1.45 |
| Nitric Oxide Signaling in the Cardiovascular System                            | 1.45 |
| iCOS-iCOSL Signaling in T Helper Cells                                         | 1.42 |
| Chemokine Signaling                                                            | 1.38 |
| PKC $\theta$ Signaling in T Lymphocytes                                        | 1.36 |
| Heme Degradation                                                               | 1.33 |
| Glutathione Redox Reactions II                                                 | 1.33 |
| Glioma Signaling                                                               | 1.32 |
| Role of Macrophages, Fibroblasts and Endothelial Cells in Rheumatoid Arthritis | 1.3  |

Supplementary Table 5. Reactome-generated canonical pathways for each brain region. P-values were generated from overrepresentation analysis.

| Reactome Pathway Analysis                                                                                                   |          |                      |                                                                  |          |                      |
|-----------------------------------------------------------------------------------------------------------------------------|----------|----------------------|------------------------------------------------------------------|----------|----------------------|
| BA19                                                                                                                        |          |                      | Cerebellum                                                       |          |                      |
| Pathway name                                                                                                                | p-value  | FDR-adjusted p-value | Pathway name                                                     | p-value  | FDR-adjusted p-value |
| Unblocking of NMDA receptors, glutamate binding and activation                                                              | 1.10E-05 | 2.62E-03             | Ion homeostasis                                                  | 4.59E-09 | 3.00E-06             |
| Influenza Life Cycle                                                                                                        | 1.23E-05 | 2.62E-03             | Erythrocytes take up oxygen and release carbon dioxide           | 8.77E-09 | 3.00E-06             |
| HSP90 chaperone cycle for steroid hormone receptors (SHR)                                                                   | 1.39E-05 | 2.62E-03             | Erythrocytes take up carbon dioxide and release oxygen           | 9.42E-08 | 1.61E-05             |
| Post-translational protein phosphorylation                                                                                  | 1.66E-05 | 2.62E-03             | O <sub>2</sub> /CO <sub>2</sub> exchange in erythrocytes         | 9.42E-08 | 1.61E-05             |
| HSF1-dependent transactivation                                                                                              | 2.08E-05 | 2.62E-03             | Ion transport by P-type ATPases                                  | 7.28E-07 | 9.90E-05             |
| Influenza Infection                                                                                                         | 2.26E-05 | 2.62E-03             | Beta oxidation of hexanoyl-CoA to butanoyl-CoA                   | 2.24E-06 | 1.90E-04             |
| Long-term potentiation                                                                                                      | 2.52E-05 | 2.62E-03             | Beta oxidation of lauroyl-CoA to decanoyl-CoA-CoA                | 2.24E-06 | 1.90E-04             |
| Peptide chain elongation                                                                                                    | 3.35E-05 | 3.05E-03             | Beta oxidation of octanoyl-CoA to hexanoyl-CoA                   | 2.24E-06 | 1.90E-04             |
| Attenuation phase                                                                                                           | 4.30E-05 | 3.09E-03             | Beta oxidation of decanoyl-CoA to octanoyl-CoA-CoA               | 4.58E-06 | 3.33E-04             |
| Selenocysteine synthesis                                                                                                    | 4.54E-05 | 3.09E-03             | Neuronal System                                                  | 4.89E-06 | 3.33E-04             |
| Eukaryotic Translation Elongation                                                                                           | 4.89E-05 | 3.09E-03             | Neurexins and neuroligins                                        | 1.33E-05 | 8.22E-04             |
| Regulation of Insulin-like Growth Factor (IGF) transport and uptake by Insulin-like Growth Factor Binding Proteins (IGFBPs) | 5.15E-05 | 3.09E-03             | Transmission across Chemical Synapses                            | 2.70E-05 | 1.54E-03             |
| Axon guidance                                                                                                               | 6.09E-05 | 3.41E-03             | Cardiac conduction                                               | 4.45E-05 | 2.31E-03             |
| Regulation of TLR by endogenous ligand                                                                                      | 1.38E-04 | 7.20E-03             | mitochondrial fatty acid beta-oxidation of saturated fatty acids | 4.83E-05 | 2.32E-03             |
| Infectious disease                                                                                                          | 1.70E-04 | 8.14E-03             | Mitochondrial Fatty Acid Beta-Oxidation                          | 6.52E-05 | 2.56E-03             |
| Negative regulation of NMDA receptor-mediated neuronal transmission                                                         | 2.02E-04 | 9.11E-03             | L1CAM interactions                                               | 6.56E-05 | 2.56E-03             |

|                                                                              |          |          |                                                                     |          |          |
|------------------------------------------------------------------------------|----------|----------|---------------------------------------------------------------------|----------|----------|
| Selenoamino acid metabolism                                                  | 2.14E-04 | 9.21E-03 | Reduction of cytosolic Ca <sup>++</sup> levels                      | 6.74E-05 | 2.56E-03 |
| Neutrophil degranulation                                                     | 2.64E-04 | 1.06E-02 | Caspase-mediated cleavage of cytoskeletal proteins                  | 6.74E-05 | 2.56E-03 |
| Eukaryotic Translation Termination                                           | 3.06E-04 | 1.16E-02 | Muscle contraction                                                  | 9.69E-05 | 3.49E-03 |
| Cellular response to heat stress                                             | 3.26E-04 | 1.17E-02 | Post NMDA receptor activation events                                | 1.26E-04 | 4.30E-03 |
| Nonsense Mediated Decay (NMD) independent of the Exon Junction Complex (EJC) | 3.47E-04 | 1.18E-02 | Platelet calcium homeostasis                                        | 1.53E-04 | 4.88E-03 |
| Platelet degranulation                                                       | 3.67E-04 | 1.21E-02 | Activation of NMDA receptors and postsynaptic events                | 1.74E-04 | 5.14E-03 |
| Cellular responses to stress                                                 | 4.20E-04 | 1.30E-02 | mitochondrial fatty acid beta-oxidation of unsaturated fatty acids  | 1.77E-04 | 5.14E-03 |
| Viral mRNA Translation                                                       | 4.68E-04 | 1.37E-02 | Transport of small molecules                                        | 1.92E-04 | 5.37E-03 |
| Response to elevated platelet cytosolic Ca <sup>2+</sup>                     | 4.72E-04 | 1.37E-02 | Protein-protein interactions at synapses                            | 2.35E-04 | 6.33E-03 |
| Formation of a pool of free 40S subunits                                     | 4.96E-04 | 1.39E-02 | Serotonin Neurotransmitter Release Cycle                            | 3.15E-04 | 7.89E-03 |
| Integration of energy metabolism                                             | 8.11E-04 | 2.07E-02 | Neurotransmitter release cycle                                      | 3.16E-04 | 7.89E-03 |
| L13a-mediated translational silencing of Ceruloplasmin expression            | 8.55E-04 | 2.07E-02 | Apoptotic execution phase                                           | 3.50E-04 | 8.39E-03 |
| Ion homeostasis                                                              | 8.69E-04 | 2.07E-02 | Ion channel transport                                               | 4.63E-04 | 1.07E-02 |
| SRP-dependent cotranslational protein targeting to membrane                  | 8.99E-04 | 2.07E-02 | Unblocking of NMDA receptors, glutamate binding and activation      | 5.59E-04 | 1.19E-02 |
| GTP hydrolysis and joining of the 60S ribosomal subunit                      | 8.99E-04 | 2.07E-02 | Negative regulation of NMDA receptor-mediated neuronal transmission | 5.59E-04 | 1.19E-02 |
| Post NMDA receptor activation events                                         | 9.61E-04 | 2.07E-02 | HSP90 chaperone cycle for steroid hormone receptors (SHR)           | 5.64E-04 | 1.19E-02 |
| Influenza Viral RNA Transcription and Replication                            | 1.07E-03 | 2.07E-02 | Apoptotic cleavage of cellular proteins                             | 6.10E-04 | 1.22E-02 |
| Nonsense-Mediated Decay (NMD)                                                | 1.10E-03 | 2.07E-02 | Detoxification of Reactive Oxygen Species                           | 6.85E-04 | 1.37E-02 |



|                                                                           |          |          |                                                                 |          |          |
|---------------------------------------------------------------------------|----------|----------|-----------------------------------------------------------------|----------|----------|
| Nonsense Mediated Decay (NMD) enhanced by the Exon Junction Complex (EJC) | 1.10E-03 | 2.07E-02 | Dopamine Neurotransmitter Release Cycle                         | 7.83E-04 | 1.49E-02 |
| p130Cas linkage to MAPK signaling for integrins                           | 1.15E-03 | 2.07E-02 | Branched-chain amino acid catabolism                            | 7.83E-04 | 1.49E-02 |
| GRB2:SOS provides linkage to MAPK signaling for Integrins                 | 1.15E-03 | 2.07E-02 | Glutamate Neurotransmitter Release Cycle                        | 9.16E-04 | 1.61E-02 |
| Activation of NMDA receptors and postsynaptic events                      | 1.22E-03 | 2.16E-02 | HSF1-dependent transactivation                                  | 9.16E-04 | 1.61E-02 |
| Eukaryotic Translation Initiation                                         | 1.27E-03 | 2.16E-02 | Cellular responses to stress                                    | 9.48E-04 | 1.61E-02 |
| Cap-dependent Translation Initiation                                      | 1.27E-03 | 2.16E-02 | Long-term potentiation                                          | 1.06E-03 | 1.77E-02 |
| L1CAM interactions                                                        | 1.33E-03 | 2.21E-02 | Signaling by BRAF and RAF fusions                               | 1.11E-03 | 1.77E-02 |
| Ras activation upon Ca <sup>2+</sup> influx through NMDA receptor         | 1.38E-03 | 2.21E-02 | Signaling by moderate kinase activity BRAF mutants              | 1.29E-03 | 1.87E-02 |
| Protein-protein interactions at synapses                                  | 1.53E-03 | 2.35E-02 | Paradoxical activation of RAF signaling by kinase inactive BRAF | 1.29E-03 | 1.87E-02 |
| Metabolism of amino acids and derivatives                                 | 1.57E-03 | 2.35E-02 | Reversible hydration of carbon dioxide                          | 1.31E-03 | 1.87E-02 |
| Formation of Fibrin Clot (Clotting Cascade)                               | 2.00E-03 | 3.00E-02 | Beta oxidation of myristoyl-CoA to lauroyl-CoA                  | 1.33E-03 | 1.87E-02 |
| Translation                                                               | 2.18E-03 | 3.26E-02 | Beta oxidation of palmitoyl-CoA to myristoyl-CoA                | 1.33E-03 | 1.87E-02 |
| Cellular responses to external stimuli                                    | 2.33E-03 | 3.26E-02 | Fatty acid metabolism                                           | 1.38E-03 | 1.93E-02 |
| Regulation of expression of SLITs and ROBOs                               | 2.39E-03 | 3.35E-02 | Interleukin-12 signaling                                        | 1.42E-03 | 1.98E-02 |
| Metabolism                                                                | 2.50E-03 | 3.50E-02 | Cellular response to heat stress                                | 1.58E-03 | 2.06E-02 |
| RAF/MAP kinase cascade                                                    | 2.75E-03 | 3.85E-02 | Uptake and actions of bacterial toxins                          | 1.70E-03 | 2.22E-02 |
| Synaptic adhesion-like molecules                                          | 2.97E-03 | 3.86E-02 | Platelet degranulation                                          | 2.08E-03 | 2.71E-02 |
| Heme degradation                                                          | 3.05E-03 | 3.97E-02 | Utilization of Ketone Bodies                                    | 2.34E-03 | 2.89E-02 |
| MAPK1/MAPK3 signaling                                                     | 3.32E-03 | 4.00E-02 | PLC beta mediated events                                        | 2.40E-03 | 2.89E-02 |
| Signaling by moderate kinase activity BRAF mutants                        | 3.33E-03 | 4.00E-02 | G-protein mediated events                                       | 2.61E-03 | 3.13E-02 |

|                                                                                  |          |          |                                                                                    |          |          |
|----------------------------------------------------------------------------------|----------|----------|------------------------------------------------------------------------------------|----------|----------|
| Paradoxical activation of RAF signaling by kinase inactive BRAF                  | 3.33E-03 | 4.00E-02 | Response to elevated platelet cytosolic Ca <sup>2+</sup>                           | 2.63E-03 | 3.16E-02 |
| Listeria monocytogenes entry into host cells                                     | 3.38E-03 | 4.06E-02 | Interleukin-12 family signaling                                                    | 3.29E-03 | 3.95E-02 |
| Common Pathway of Fibrin Clot Formation                                          | 3.38E-03 | 4.06E-02 | Oncogenic MAPK signaling                                                           | 3.30E-03 | 3.96E-02 |
| Transmission across Chemical Synapses                                            | 3.69E-03 | 4.18E-02 | Beta oxidation of butanoyl-CoA to acetyl-CoA                                       | 3.62E-03 | 3.98E-02 |
| Dopamine Neurotransmitter Release Cycle                                          | 3.83E-03 | 4.18E-02 | Signaling by RAS mutants                                                           | 3.82E-03 | 4.20E-02 |
| Nephrin family interactions                                                      | 3.83E-03 | 4.18E-02 | Glutathione conjugation                                                            | 4.34E-03 | 4.77E-02 |
| NrCAM interactions                                                               | 4.12E-03 | 4.18E-02 | Gene and protein expression by JAK-STAT signaling after Interleukin-12 stimulation | 4.34E-03 | 4.77E-02 |
| Activation of C3 and C5                                                          | 4.12E-03 | 4.18E-02 |                                                                                    |          |          |
| Scavenging by Class F Receptors                                                  | 4.12E-03 | 4.18E-02 |                                                                                    |          |          |
| Neuronal System                                                                  | 4.16E-03 | 4.18E-02 |                                                                                    |          |          |
| Innate Immune System                                                             | 4.18E-03 | 4.18E-02 |                                                                                    |          |          |
| CREB1 phosphorylation through NMDA receptor-mediated activation of RAS signaling | 4.31E-03 | 4.31E-02 |                                                                                    |          |          |

Supplementary Table 6. Full upstream regulator list for each brain region.

| <b>BA19</b>    |                |                |                |
|----------------|----------------|----------------|----------------|
| <b>Protein</b> | <b>p-value</b> | <b>Protein</b> | <b>p-value</b> |
| MAPT           | 6.54E-09       | C1QA           | 0.0186         |
| APP            | 8.85E-08       | OLIG2          | 0.0186         |
| RTN4           | 1.1E-07        | mir-181        | 0.0186         |
| PSEN1          | 2.35E-07       | mir-485        | 0.0186         |
| HTT            | 2.22E-06       | KCNQ2          | 0.0186         |
| MTOR           | 5.72E-06       | ANGPT2         | 0.0186         |
| ROR1           | 0.0000868      | Dst            | 0.0186         |
| ROR2           | 0.0000868      | JAK2           | 0.0186         |
| Inosine        | 0.000242       | NEURL1         | 0.0186         |
| LPIN1          | 0.000259       | EEF2K          | 0.0186         |
| AGRN           | 0.000259       | NFIC           | 0.0186         |
| GALNS          | 0.000259       | RAB3B          | 0.0186         |
| PRNP           | 0.00041        | EIF4EBP2       | 0.0186         |
| PPP3CA         | 0.000422       | ST8SIA2        | 0.0186         |
| SLC6A3         | 0.000494       | QKI            | 0.0186         |
| S100B          | 0.000514       | melatonin      | 0.0186         |
| SLC6A2         | 0.000852       | SLC16A2        | 0.0244         |
| DIO2           | 0.00094        | IL6            | 0.0244         |
| ATN1           | 0.000955       | CREBBP         | 0.0261         |
| ADORA2A        | 0.00126        | BSCL2          | 0.0278         |
| PPP1R15A       | 0.00127        | UBA6           | 0.0278         |
| REST           | 0.00158        | ST8SIA4        | 0.0278         |
| SLC30A3        | 0.00177        | PLCE1          | 0.0278         |
| MKNK1          | 0.00187        | NPTX1          | 0.0278         |
| SOD1           | 0.00225        | KRAS           | 0.0278         |
| PMP22          | 0.00234        | ARRB2          | 0.0278         |
| DKK1           | 0.00234        | DCX            | 0.0278         |
| GAST           | 0.0027         | TP63           | 0.0278         |
| TENM1          | 0.00299        | GRM2           | 0.0278         |
| SLC18A2        | 0.00299        | GABBR2         | 0.0278         |
| ESR2           | 0.00299        | KCNIP3         | 0.0278         |
| GFAP           | 0.00299        | RANBP9         | 0.0278         |
| HDAC4          | 0.00301        | HEPH           | 0.0278         |
| CEBPB          | 0.00372        | NCAM1          | 0.0278         |
| L-dopa         | 0.00452        | MME            | 0.0278         |
| Ethanol        | 0.00508        | DYRK1A         | 0.0278         |
| TOR1A          | 0.00633        | PLD2           | 0.0278         |
| BDNF           | 0.00645        | ADAM10         | 0.0288         |

|           |         |                |        |
|-----------|---------|----------------|--------|
| FGF1      | 0.00734 | STAT3          | 0.0299 |
| NFE2L2    | 0.00734 | beta-estradiol | 0.0305 |
| APOE      | 0.00792 | JUN            | 0.0338 |
| D-glucose | 0.00841 | ATP            | 0.0369 |
| FMR1      | 0.00852 | SOX17          | 0.0369 |
| SIRT1     | 0.00905 | SLITRK5        | 0.0369 |
| SLC4A5    | 0.00935 | VIP            | 0.0369 |
| PDCD10    | 0.00935 | SOD2           | 0.0369 |
| MYO5A     | 0.00935 | ITGB1          | 0.0369 |
| GMNN      | 0.00935 | mir-29         | 0.0369 |
| JAK1      | 0.00935 | TGFA           | 0.0369 |
| TFAP4     | 0.00935 | FGFR3          | 0.0369 |
| SEMA3A    | 0.00935 | RETN           | 0.0369 |
| CX3CL1    | 0.00935 | SPTBN2         | 0.0369 |
| LDLR      | 0.00935 | GRM3           | 0.0369 |
| TNR       | 0.00935 | ABCA1          | 0.0369 |
| TEK       | 0.00935 | SGK1           | 0.0369 |
| CDON      | 0.00935 | CAMK2A         | 0.0369 |
| LIFR      | 0.00935 | cholesterol    | 0.0369 |
| Mt3       | 0.00935 | CREB1          | 0.0417 |
| DOPEG     | 0.00935 | ZNF106         | 0.0422 |
| PPARG     | 0.00956 | ESR1           | 0.0422 |
| NFASC     | 0.0108  | PRKCD          | 0.0459 |
| LEPR      | 0.012   | ZFP36L2        | 0.0459 |
| PRKN      | 0.012   | NGFR           | 0.0459 |
| EGR2      | 0.0125  | PKM            | 0.0459 |
| TSC2      | 0.0162  | TP73           | 0.0459 |
| CPEB3     | 0.0186  | THRA           | 0.0459 |
| SV2A      | 0.0186  | -              | -      |

#### Cerebellum

| Protein  | p-value  | Protein | p-value |
|----------|----------|---------|---------|
| MAPT     | 3.39E-15 | NAGLU   | 0.012   |
| APP      | 7.45E-13 | SIX5    | 0.012   |
| PSEN1    | 3.36E-12 | GPX4    | 0.012   |
| HTT      | 5.17E-12 | LIFR    | 0.012   |
| HDAC4    | 1.12E-11 | Mt3     | 0.012   |
| MKNK1    | 1.2E-09  | BNIP3   | 0.012   |
| BDNF     | 3.18E-09 | IGF1    | 0.0146  |
| ATN1     | 2.14E-07 | PPARG   | 0.0153  |
| PPP3CA   | 2.86E-07 | FMR1    | 0.0165  |
| PPARGC1A | 6.29E-07 | SLC6A3  | 0.0172  |

|                     |           |           |        |
|---------------------|-----------|-----------|--------|
| NTRK2               | 0.0000101 | EGF       | 0.0172 |
| MTOR                | 0.0000284 | ADORA2A   | 0.0196 |
| RTN4                | 0.000137  | NPAS4     | 0.0238 |
| RAB3B               | 0.000142  | CLASP2    | 0.0238 |
| NFE2L2              | 0.000159  | C1QA      | 0.0238 |
| Sucrose             | 0.000341  | OLIG2     | 0.0238 |
| REST                | 0.000371  | SNCB      | 0.0238 |
| SNCA                | 0.000371  | CAST      | 0.0238 |
| S100B               | 0.000839  | ATF1      | 0.0238 |
| TRPM2               | 0.000839  | KCNQ2     | 0.0238 |
| SOD2                | 0.000839  | LCAT      | 0.0238 |
| TGFA                | 0.000839  | Dst       | 0.0238 |
| SPTBN2              | 0.000839  | PIK3CB    | 0.0238 |
| LEP                 | 0.000861  | NFIC      | 0.0238 |
| ZFP36L2             | 0.00139   | ST8SIA2   | 0.0238 |
| LEPR                | 0.00141   | melatonin | 0.0238 |
| PRNP                | 0.00165   | DIO2      | 0.0257 |
| SETDB1              | 0.00191   | CTNNB1    | 0.0305 |
| NTF4                | 0.00207   | LPIN1     | 0.0354 |
| FBXO2               | 0.00207   | AGRN      | 0.0354 |
| Dihydrotestosterone | 0.00249   | GALNS     | 0.0354 |
| MECP2               | 0.00255   | PURA      | 0.0354 |
| APOE                | 0.0035    | ST8SIA4   | 0.0354 |
| SHANK3              | 0.0038    | SERPINE1  | 0.0354 |
| IL6                 | 0.00398   | PLCE1     | 0.0354 |
| TSC2                | 0.00476   | NPTX1     | 0.0354 |
| TAC1                | 0.00484   | KRAS      | 0.0354 |
| GFAP                | 0.00484   | P2RY2     | 0.0354 |
| L-dopa              | 0.00625   | ATF3      | 0.0354 |
| FGF2                | 0.00704   | KCNIP3    | 0.0354 |
| DNAJC3              | 0.00728   | RANBP9    | 0.0354 |
| SOD1                | 0.00769   | NCAM1     | 0.0354 |
| CREB1               | 0.00831   | MME       | 0.0354 |
| TOR1A               | 0.0102    | PLD2      | 0.0354 |
| ADAM10              | 0.0103    | NTRK3     | 0.0354 |
| FOXQ1               | 0.012     | SLC16A2   | 0.0383 |
| NFATC3              | 0.012     | CREBBP    | 0.041  |
| HTR2A               | 0.012     | CNTF      | 0.0438 |
| MYO5A               | 0.012     | STAT3     | 0.0467 |
| GMNN                | 0.012     | SLCO1C1   | 0.047  |
| NRF1                | 0.012     | SLC6A4    | 0.047  |
| SYP                 | 0.012     | ITGB1     | 0.047  |

|        |       |             |        |
|--------|-------|-------------|--------|
| TFAP4  | 0.012 | FGFR3       | 0.047  |
| CHRNA7 | 0.012 | RETN        | 0.047  |
| CX3CL1 | 0.012 | ABCA1       | 0.047  |
| MARK2  | 0.012 | cholesterol | 0.047  |
| DNAJC5 | 0.012 | GAST        | 0.0497 |

Supplementary Table 7. Summary of targeted MS validation analysis using one-sided Wilcoxon signed rank tests to generate SRM p-values. Directionality concordance assessed whether differential expression aligned with global proteomic findings at the peptide and protein levels. Global p-value refers to the p-value calculated from the global proteomic MS analysis for the associated protein. P-values for one peptide cannot be meaningfully determined for paired analysis.

| BA19         |                       |                            |                              |                           |                |             |
|--------------|-----------------------|----------------------------|------------------------------|---------------------------|----------------|-------------|
| Protein      | Peptide               | Directionality concordance | % Expression A vs C (global) | % Expression A vs C (SRM) | Global p-value | SRM p-value |
| <b>GFAP</b>  | -                     | ✓                          | 55.2                         | 56                        | 5.36E-06       | 0.1377      |
|              | ALAAELNQLR            | ✓                          | -                            | 54                        | -              | 0.2188      |
|              | EAASYQEALAR           | ✓                          | -                            | 60                        | -              | 0.3125      |
| <b>MAP1B</b> | -                     | ✓                          | 84                           | 87                        | 1.86E-09       | 0.058       |
|              | DLSTPGLEK             | ✓                          | -                            | 87                        | -              | 0.1563      |
|              | PQLELIEDEEK           | ✓                          | -                            | 86                        | -              | 0.1875      |
| <b>INA</b>   | -                     | ✓                          | 79                           | 75                        | 0.001041       | 0.0088      |
|              | DVDGATLAR             | ✓                          | -                            | 81                        | -              | 0.093       |
|              | FAVFIK                | ✓                          | -                            | 66                        | -              | 0.0625      |
| <b>GSTM3</b> | -                     | ✓                          | 69                           | 67                        | 6.39E-04       | 0.0654      |
|              | LDLDFPNLPYLLDGK       | ✓                          | -                            | 72                        | -              | 0.1563      |
|              | LTFVDFLTYDILDQNR      | ✓                          | -                            | 65                        | -              | 0.1563      |
| <b>RNAbp</b> | -                     | ✓                          | 51                           | 88                        | 0.000503       | 0.1973      |
|              | LFVGGLSFDTNEQSLEQVFSK | ✗                          | -                            | 117                       | -              | 0.406       |
|              | YGQISEVVVVK           | ✓                          | -                            | 67                        | -              | 0.0313      |
| <b>CHL1</b>  | VIAVNEVGR             | ✓                          | 63.6                         | 83                        | 0.001206241    | 0.125       |
| CB           |                       |                            |                              |                           |                |             |
| Protein      | Peptide               | Directionality concordance | % Expression A vs C (global) | % Expression A vs C (SRM) | Global p-value | SRM p-value |
| <b>PSD3</b>  | -                     | ✓                          | 156                          | 135                       | 1.35E-08       | 0.0011      |
|              | NAVSVHHALASK          | ✓                          | -                            | 141                       | -              | 0.0234      |
|              | DHYLEFEK              | ✓                          | -                            | 130                       | -              | 0.0059      |
| <b>SYN1</b>  | -                     | ✓                          | 136                          | 129                       | 6.30E-06       | 0.021       |
|              | QASQAGPVPR            | ✓                          | -                            | 129                       | -              | 0.0762      |
|              | QTSVSGPAPPK           | ✓                          | -                            | 129                       | -              | 0.043       |
| <b>NEFM</b>  | -                     | ✓                          | 70                           | 48                        | 1.21E-05       | 0.0009      |
|              | FVEEIIIEETK           | ✓                          | -                            | 75                        | -              | 0.0352      |
|              | SEMEEALTAITEELAVSMK   | ✓                          | -                            | 24                        | -              | 0.0059      |
| <b>HBD</b>   | -                     | ✓                          | 56.8                         | 72.8                      | 4.64E-11       | 0.0634      |
|              | EFTPQMQAAYQK          | ✓                          | -                            | 63                        | -              | 0.0781      |
|              | VHLTPEEK              | ✓                          | -                            | 73                        | -              | 0.1504      |
| <b>VAMP2</b> | -                     | ✓                          | 173                          | 121                       | 0.002818185    | 0.0122      |
|              | ADALQAGASQFETSAAK     | ✓                          | -                            | 149                       | -              | 0.0508      |
|              | LQQTQAQVDEVVDIMR      | ✓                          | -                            | 117                       | -              | 0.1016      |
| <b>MAPT</b>  | -                     | ✓                          | 138                          | 113                       | 0.001067       | 0.1931      |
|              | IGSLDNITHVPGGGNK      | ✓                          | -                            | 115                       | -              | 0.2129      |
|              | SPVVSQDTSR            | ✓                          | -                            | 105                       | -              | 0.3965      |

Supplementary Table 8. Cell type-specific markers in BA19 and CB. ‘Yes’ and ‘No’ indicate whether the specified protein is quantified in BA19 or CB. A single asterisk indicates  $p < 0.05$  between ASD and Control from the regression model, while two asterisks indicate  $q < 0.05$ . Proteins with multiple isoforms are denoted in parentheses.

| <b>CELL SPECIFIC MARKERS</b>       |                |                |                  |
|------------------------------------|----------------|----------------|------------------|
| <b>CELL TYPE</b>                   | <b>Marker</b>  | <b>BA19</b>    | <b>CB</b>        |
| ASTROCYTES                         | GFAP           | Yes**          | Yes*             |
|                                    | S100           | Yes            | Yes *            |
|                                    | SLC1A3         | Yes*           | Yes              |
| NEURONS                            | NEFH/NEFL/NEFM | Yes (/ **/**)  | Yes (**/**/**)   |
|                                    | RFOX3          | No             | No               |
|                                    | ELAVL4         | Yes            | Yes              |
|                                    | ELAVL1         | Yes            | Yes              |
| GABAERGIC <sup>1,2</sup>           | TUBB3          | Yes*           | Yes              |
|                                    | GAD2           | Yes            | Yes              |
|                                    | GAD1           | No             | No               |
|                                    | ABAT           | Yes            | Yes              |
|                                    | GAT1           | No             | No               |
| GLUTAMATERGIC <sup>1,3</sup>       | GABRB          | Yes            | Yes*             |
|                                    | SLC17A7        | Yes            | Yes**            |
|                                    | SLC17A6        | No             | No               |
|                                    | GLS            | Yes            | Yes              |
|                                    | GLUL           | Yes            | Yes              |
| PURKINJE CELLS <sup>4,5</sup>      | GRIN1          | No             | No               |
|                                    | CBLN           | No             | Yes              |
|                                    | CALB           | Yes*           | Yes*             |
|                                    | ITPR1          | Yes            | Yes**            |
| PYRAMIDAL CELLS <sup>6,7,8,9</sup> | CAMK2(A/B/C/D) | Yes (A/B*/C/D) | Yes (A/B**/C*/D) |
|                                    | MAP2           | Yes*           | Yes              |
|                                    | DLG4           | Yes**          | Yes              |
|                                    | EMX1           | No             | No               |
| MICROGLIA                          | PTPRC          | No             | No               |
|                                    | AIF1           | No             | No               |
|                                    | CD68           | No             | No               |
|                                    | CIITA          | Yes            | No               |
|                                    | ITGAM          | No             | No               |
| OLIGODENDROCYTES                   | P2RY12         | No             | No               |
|                                    | MBP            | Yes            | Yes              |
|                                    | PLP            | Yes            | Yes              |
|                                    | MOG            | Yes            | Yes              |
| MAST CELLS <sup>19</sup>           | OLIG2          | No             | No               |
|                                    | KIT            | No             | No               |
|                                    | FCER1          | No             | No               |
|                                    | CD2            | No             | No               |
|                                    | IL2RA          | No             | No               |
| ENDOTHELIAL CELLS <sup>11</sup>    | CR1            | No             | No               |
|                                    | F8C            | No             | No               |
|                                    | PECAM1         | No             | No               |
|                                    | ACE            | No             | No               |
|                                    | THBD           | No             | No               |
| RED BLOOD CELLS <sup>12</sup>      | ATXN1          | No             | No               |
|                                    | HEMCAM         | No             | No               |
|                                    | CAT            | Yes            | Yes**            |
|                                    | HBA/HBB/HBD    | Yes            | Yes (**/**/**)   |



- <sup>1</sup>The Brain-specific Proteome. The Human Protein Atlas.  
<http://www.proteinatlas.org/humanproteome/brain>
- <sup>2</sup>GABAergic neuron markers and their functions.  
<http://www.abcam.com/neuroscience/gabaergic-neuron-markers-and-their-functions>
- <sup>3</sup>Glutamatergic neuron markers and their functions.  
<http://www.abcam.com/neuroscience/glutamatergic-neuron-markers-and-their-functions>
- <sup>4</sup> Fernandez-Pol, A. A novel marker for Purkinje cells, ribosomal protein MPS1/S27: expression of MPS1 in human cerebellum. *Cancer Genomics Proteomics* 13, 47-53 (2016).
- <sup>5</sup> Slemmon, J.R. *et al.* Cerebellin: a quantifiable marker for Purkinje cell maturation. *Proc Natl Acad Sci USA* 82, 7145-7148 (1985).
- <sup>6</sup> Muller, J.F., Mascagni, F. & McDonald, A.J. Pyramidal cells of the rat basolateral amygdala: synaptology and innervation by parvalbumin-immunoreactive interneurons. *J Comp Neurol* 494, 635-650 (2006).
- <sup>7</sup> Hayashi, N., Oohira, A. & Miyata, S. Synaptic localization of receptor-type protein tyrosine phosphatase  $\zeta/\beta$  in the cerebral and hippocampal neurons of adult rats. *Brain Res* 1050, 163-169 (2005).
- <sup>8</sup> Kawachi, H. *et al.* Protein tyrosine phosphatase  $\zeta$ /RPTP $\beta$  interacts with PSD-95/SAP90 family. *Molec Brain Res* 72, 47-54 (1999).
- <sup>9</sup> Chan, C-H. *et al.* Emx1 is a marker for pyramidal neurons of the cerebral cortex. *Cereb Cortex* 11, 1191-1198 (2001).
- <sup>10</sup> Hauswirth, A. *et al.* Expression of cell surface antigens on mast cells. *Mast Cells: Methods and Protocols* 77-90 (2005).
- <sup>11</sup> Garlanda, C. & Dejana, E. Heterogeneity of endothelial cells specific markers. *Arterioscl Thromb Vasc Biol* 17, 1193-1202 (1997).
- <sup>12</sup> You, J.S. *et al.* The impact of blood contamination on the proteome of cerebrospinal fluid. *Proteomics* 5, 290-296 (2005).

Supplementary Figure 1. Representative box plots of cell type-specific marker analysis for red blood cells (HBB), neurons (NEFM), astrocytes (GFAP), and oligodendrocytes (MBP) for matched pairs in each brain region. All paired t-test analyses were non-significant ( $p > 0.05$ ).

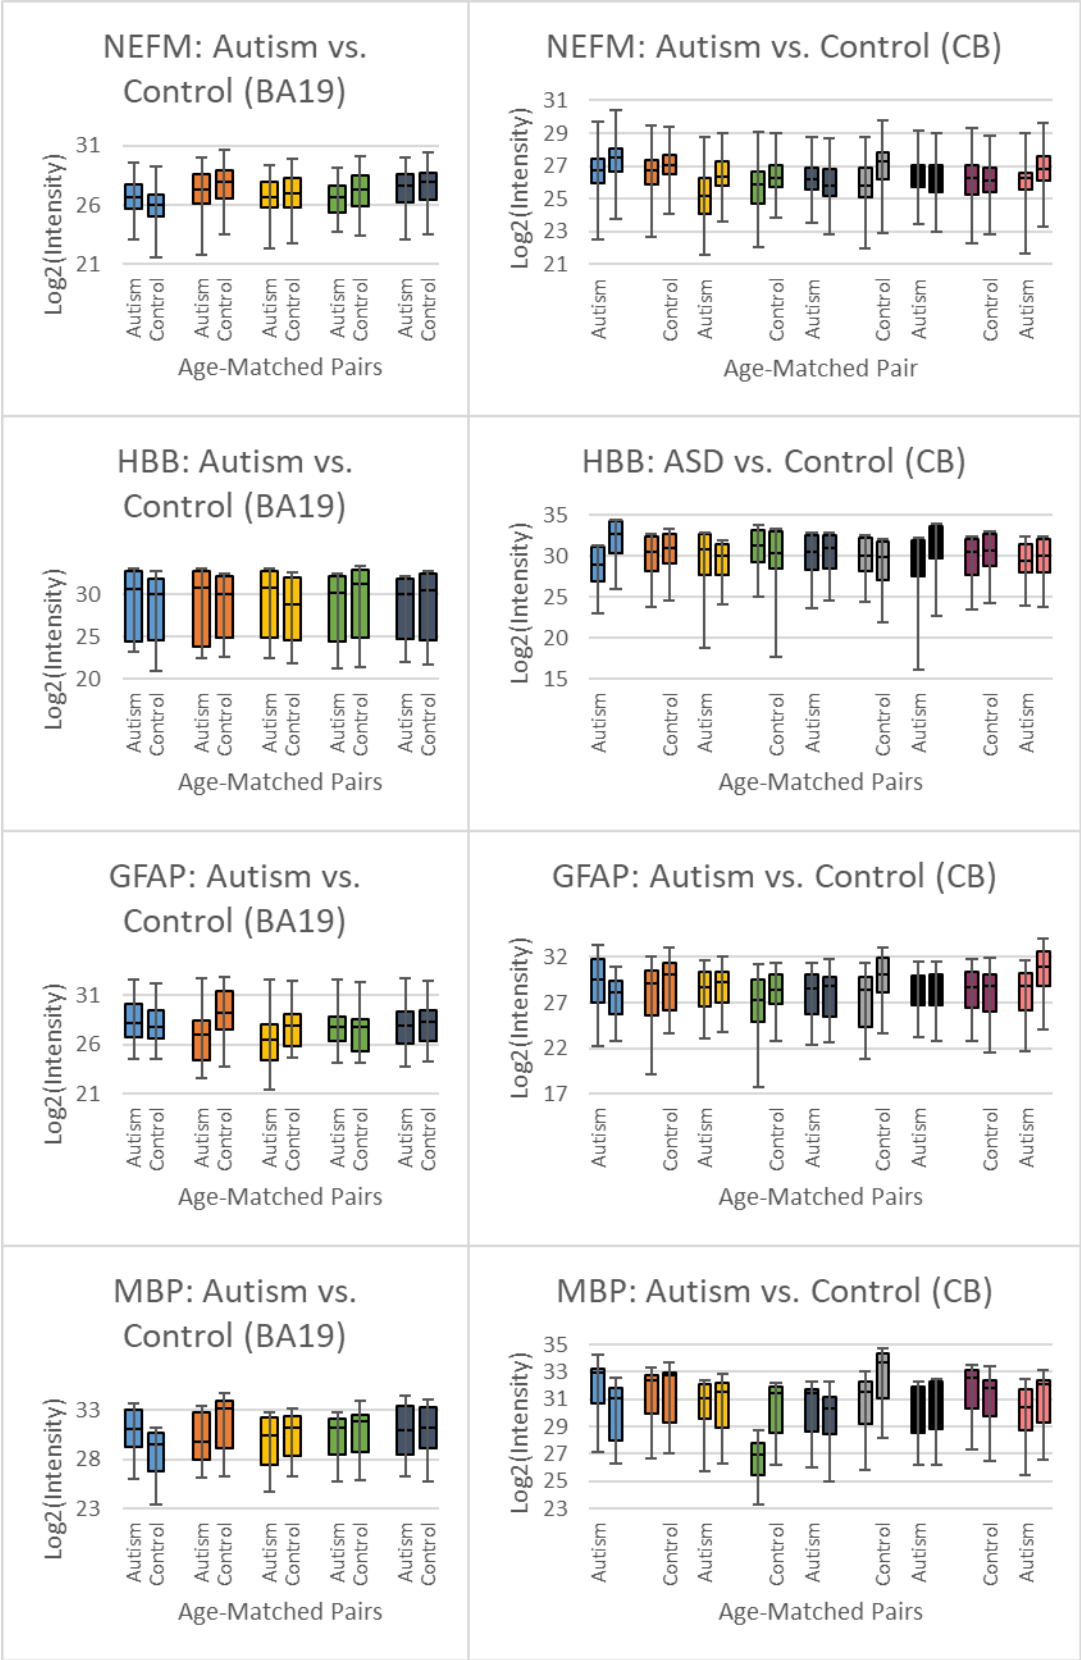

Supplement: 41598_2019_49533_MOESM1_ESM.pdf [file 41598_2019_49533_MOESM1_ESM.pdf]
